# Supplementary material for: General practitioner visits after SARS-CoV-2 omicron compared with the delta variant in children in Norway: a prospective nationwide registry study
Source: PubMed Central journal article supplement (PMC9421916; doi:10.1136/bmjpo-2022-001502), 2022-08-26
Supplement: bmjpo-2022-001502.draft_revisions.pdf [file bmjpo-2022-001502.draft_revisions.pdf]

# BMJ Paediatrics Open

BMJ Paediatrics Open is committed to open peer review. As part of this commitment we make the peer review history of every article we publish publicly available.

When an article is published we post the peer reviewers' comments and the authors' responses online. We also post the versions of the paper that were used during peer review. These are the versions that the peer review comments apply to.

The versions of the paper that follow are the versions that were submitted during the peer review process. They are not the versions of record or the final published versions. They should not be cited or distributed as the published version of this manuscript.

BMJ Paediatrics Open is an open access journal and the full, final, typeset and author-corrected version of record of the manuscript is available on our site with no access controls, subscription charges or pay-per-view fees (<http://bmjpaedsopen.bmj.com>).

If you have any questions on BMJ Paediatrics Open's open peer review process please email [info.bmjpo@bmj.com](mailto:info.bmjpo@bmj.com)

# BMJ Paediatrics Open

## General practitioner visits after SARS-CoV-2 Omicron compared to the Delta variant in children: a prospective nationwide registry study

|                               |                                                                                                                                                                                                                                                                                                                                                                                                                                                         |
|-------------------------------|---------------------------------------------------------------------------------------------------------------------------------------------------------------------------------------------------------------------------------------------------------------------------------------------------------------------------------------------------------------------------------------------------------------------------------------------------------|
| Journal:                      | <i>BMJ Paediatrics Open</i>                                                                                                                                                                                                                                                                                                                                                                                                                             |
| Manuscript ID                 | bmjpo-2022-001502                                                                                                                                                                                                                                                                                                                                                                                                                                       |
| Article Type:                 | Original research letter                                                                                                                                                                                                                                                                                                                                                                                                                                |
| Date Submitted by the Author: | 05-Apr-2022                                                                                                                                                                                                                                                                                                                                                                                                                                             |
| Complete List of Authors:     | Arntzen, Sigurd Storehaug; Norwegian Institute of Public Health<br>Gjefsen, Hege Marie; Norwegian Institute of Public Health<br>Telle, Kjetil Elias; Norwegian Institute of Public Health<br>Magnusson, Karin; Norwegian Institute of Public Health<br>Stordal, Ketil; Norwegian Institute of Public Health<br>Håberg, Siri; Norwegian Institute of Public Health, Institute Management and Staff<br>Kinge, Jonas; Norwegian Institute of Public Health |
| Keywords:                     | COVID-19                                                                                                                                                                                                                                                                                                                                                                                                                                                |
|                               |                                                                                                                                                                                                                                                                                                                                                                                                                                                         |

SCHOLARONE™  
Manuscripts

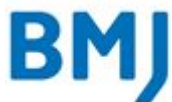

I, the Submitting Author has the right to grant and does grant on behalf of all authors of the Work (as defined in the below author licence), an exclusive licence and/or a non-exclusive licence for contributions from authors who are: i) UK Crown employees; ii) where BMJ has agreed a CC-BY licence shall apply, and/or iii) in accordance with the terms applicable for US Federal Government officers or employees acting as part of their official duties; on a worldwide, perpetual, irrevocable, royalty-free basis to BMJ Publishing Group Ltd ("BMJ") its licensees and where the relevant Journal is co-owned by BMJ to the co-owners of the Journal, to publish the Work in this journal and any other BMJ products and to exploit all rights, as set out in our [licence](#).

The Submitting Author accepts and understands that any supply made under these terms is made by BMJ to the Submitting Author unless you are acting as an employee on behalf of your employer or a postgraduate student of an affiliated institution which is paying any applicable article publishing charge ("APC") for Open Access articles. Where the Submitting Author wishes to make the Work available on an Open Access basis (and intends to pay the relevant APC), the terms of reuse of such Open Access shall be governed by a Creative Commons licence – details of these licences and which [Creative Commons](#) licence will apply to this Work are set out in our licence referred to above.

Other than as permitted in any relevant BMJ Author's Self Archiving Policies, I confirm this Work has not been accepted for publication elsewhere, is not being considered for publication elsewhere and does not duplicate material already published. I confirm all authors consent to publication of this Work and authorise the granting of this licence.

1  
2  
3 **General practitioner visits after SARS-CoV-2 Omicron compared to the Delta variant**  
4 **in children: a prospective nationwide registry study**  
5  
6

7 Sigurd Storehaug Arntzen, MPhil<sup>1</sup>, Hege Marie Gjefsen, PhD<sup>1</sup>, Kjetil Elias Telle, PhD<sup>1</sup>,  
8 Karin Magnusson, PhD<sup>1</sup>, Ketil Størdal, MD PhD<sup>2</sup>, Siri Håberg, MD PhD<sup>3</sup>, Jonas Minet  
9 Kinge, PhD<sup>1,3,4</sup>  
10

11 <sup>1</sup> Cluster for Health Services Research, Norwegian Institute of Public Health

12 <sup>2</sup> Division of Paediatric and Adolescent Medicine, University of Oslo

13 <sup>3</sup> Centre for Fertility and Health, Norwegian Institute of Public Health

14 <sup>4</sup> Department of Health Management and Health Economics, University of Oslo  
15  
16  
17

18 **Address correspondence to:** Jonas Minet Kinge, Norwegian Institute of Public Health,  
19 Postboks 222, Skøyen, N-0213 Oslo  
20 E-mail: jonas.minet.kinge@fhi.no  
21  
22  
23

24 **Conflict of Interest Disclosures (includes financial disclosures):** The authors have no  
25 example conflicts of interest to disclose.  
26  
27

28 **Funding/Support: Funding:** The study was internally funded by the Norwegian Institute of  
29 Public Health and externally by the Research Council of Norway (project no 262700). The  
30 funding sources had no influence over the design and conduct of the study; collection,  
31 management, analysis, and interpretation of the data; preparation, review, or approval of the  
32 manuscript; or decision to submit the manuscript for publication.  
33  
34  
35  
36  
37  
38  
39  
40  
41  
42  
43  
44  
45  
46  
47  
48  
49  
50  
51  
52  
53  
54  
55  
56  
57  
58  
59  
60

**Word Count:** 508

1  
2  
3 SARS-CoV-2 in children leads to milder symptoms than in adults.<sup>1</sup> However, recent reports  
4  
5 discuss whether the omicron variant might cause more severe symptoms than the delta  
6  
7 variant in children.<sup>2</sup> In Norway, general practitioners (GP) serve as the first line health  
8  
9 service and are free for children aged below 16. Based on national recommendations, healthy  
10  
11 children below age 12 are mostly unvaccinated.<sup>3</sup> PCR tests are freely available and a  
12  
13 proportion of these are screened for variants.  
14  
15

16  
17  
18  
19 The aim of this analysis was to compare GP contacts among children in the five weeks after  
20  
21 being infected with omicron or delta variants.  
22  
23

24  
25  
26 Using data from the Emergency Preparedness Register (Beredt C19), we followed Norwegian  
27  
28 residents aged 0-10 years from the 29<sup>th</sup> of November 2021 until 23<sup>rd</sup> of January 2022  
29  
30 (Supplemental Table 1). The outcome variable was defined as at least one physical- or e-  
31  
32 consultation with a GP in a week. Children who tested positive but whose tests were not  
33  
34 sequenced, and children who had been vaccinated, were excluded from the analysis.  
35  
36 Multivariate logistic regression was used to estimate adjusted odds ratios (aOR) with 95%  
37  
38 confidence intervals (CI) for GP consultations. Exploiting the longitudinal nature of the data,  
39  
40 we used an event-study design, controlling for calendar week of consultation, municipality  
41  
42 fixed effects and sociodemographic controls. The temporal aORs of being infected by  
43  
44 omicron and delta were estimated from 5 weeks before to 4 weeks after the week 0 of  
45  
46 infection (Supplemental Methods part 2). The event-study allows for testing whether infected  
47  
48 children followed the same patterns for GP visits as the noninfected.<sup>4</sup> The reference category  
49  
50 was 1 week prior to infection and noninfected individuals were included as controls. We also  
51  
52 varied the time period to explore the robustness of our findings.  
53  
54  
55  
56  
57  
58  
59  
60

1  
2  
3 In total, 661,587 children, aged 0–10 years, were included in the study. After excluding  
4  
5 47,683 children with positive test during the study period that were not sequenced and 474  
6  
7 children who were vaccinated, the primary study population consisted of 613,448 children  
8  
9 comprising 4,907,584 person-weeks (Table). The delta variant was the dominant strain at the  
10  
11 beginning and omicron was the dominant strain at the end of the study period (Supplemental  
12  
13 Figure 1).  
14  
15

16  
17  
18  
19 GP consultations in the weeks before infection were similar for the children with omicron and  
20  
21 delta in the adjusted model (See the Figure and Supplemental Tables 2, 3 & 4). The aORs in  
22  
23 the first and second week after positive tests were higher for delta than for omicron. Higher  
24  
25 GP utilization was also found for children 4 and 5 weeks after testing positive for delta but  
26  
27 returned to pre-infection levels in week 5 for omicron cases. Results from robustness control  
28  
29 were similar (Supplemental Table 4).  
30  
31  
32

33  
34  
35 Strengths of this study includes the use of data covering all Norwegian children and that both  
36  
37 delta and omicron was circulating during our study period. A limitation of the study is that  
38  
39 asymptomatic children may have been less likely to have had a test. If for example,  
40  
41 asymptomatic SARS-CoV-2 was more common for the omicron virus, we might have  
42  
43 underestimated the difference between the two strains.  
44  
45  
46

#### 47 48 **Patient and public involvement**

49  
50 No patients were involved in setting the research question or the outcome measures, nor were  
51  
52 they involved in developing plans for recruitment, design, or implementation of the study. No  
53  
54 patients were asked to advise on interpretation or writing up of results. There are no plans to  
55  
56 disseminate the results of the research to study participants or the relevant patient community.  
57  
58  
59  
60

## Funding

The study was internally funded by the Norwegian Institute of Public Health and externally by the Research Council of Norway (project no 262700).

## Acknowledgments

The establishment of an emergency preparedness register forms part of the legally mandated responsibilities of the Norwegian Institute of Public Health during epidemics. The Ethics Committee of South-East Norway confirmed (4 June 2020, #153204) that external ethical board review was not required.

## References:

1. Lee B, Raszka WV, Jr. COVID-19 in Children: Looking Forward, Not Back. *Pediatrics* 2021;147(1). DOI: 10.1542/peds.2020-029736.
2. Kozlov M. Does Omicron hit kids harder? Scientists are trying to find out. *Nature* Web Site.
3. Coronavirus vaccine - information for the public. The Norwegian Institute of Public Health (NIPH). 28.02.2022 (<https://www.fhi.no/en/id/vaccines/coronavirus-immunisation-programme/coronavirus-vaccine/#vaccination-of-children-and-adolescents>).
4. Dimick JB, Ryan AM. Methods for Evaluating Changes in Health Care Policy: The Difference-in-Differences Approach. *JAMA* 2014;312(22):2401-2402. DOI: 10.1001/jama.2014.16153.

**Table: Summary statistics of the estimation sample**

|                                          | Omicron   | Delta    | Rest      |
|------------------------------------------|-----------|----------|-----------|
| <b>N</b>                                 | 7,046     | 14,369   | 613,448   |
| <b>Person-weeks</b>                      | 56,368    | 114,952  | 4,907,584 |
| <b>Age, mean (SD)</b>                    | 6.1 (3.1) | 6.9(2.8) | 5.2 (3.2) |
| <b>Born Foreign Country, (%)</b>         | 7.2       | 6.3      | 5.5       |
| <b>Parents foreign Born Country, (%)</b> | 53.7      | 43.0     | 38.8      |
| <b>Boys, (%)</b>                         | 51.3      | 51.4     | 51.3      |

**Notes:** Standard deviation in brackets

**Figure: Event-study analysis of pre- and post-SARS-COV-2 trends in odds ratios for GP utilization by variant**

[Figure]

Note: Estimates from logistic regression analysis on weekly data are reported. Adjusted odds ratios were estimated for indicator variables for relative week to omicron and delta and the omitted category defined as one week prior to infection, i.e week -1. Odds ratios were adjusted for age by including age indicators for 1 year age groups, sex, indicator for birth country and parental birth country, and municipality of residence. Standard errors are clustered at municipality level.



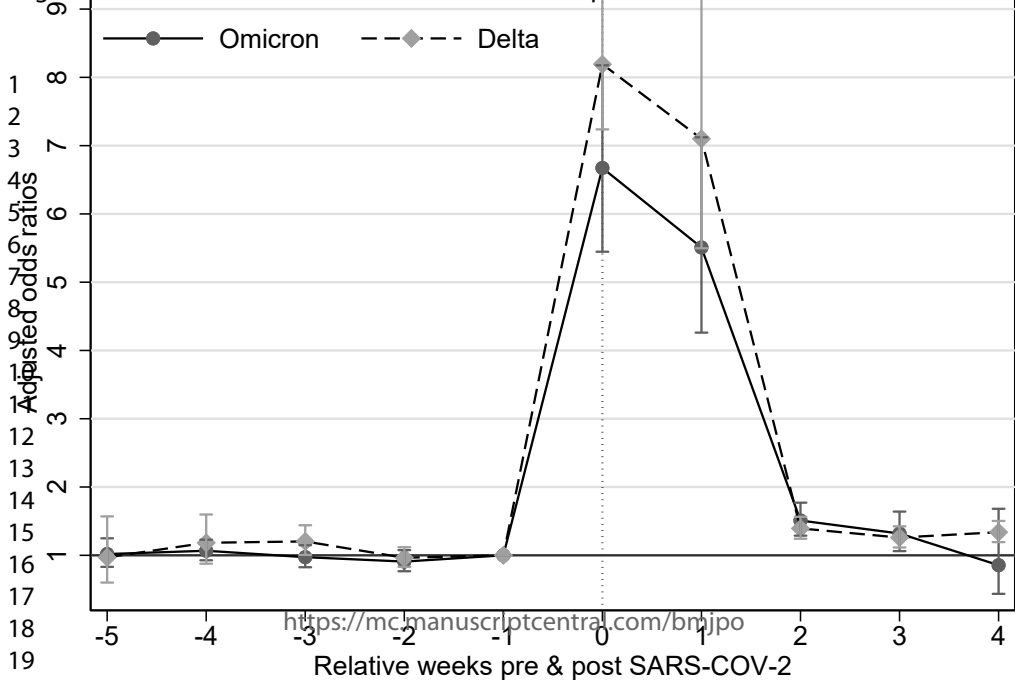

**Supplementary online content**

Arntzen et al. *General practitioner visits after SARS-CoV-2 Omicron compared to the Delta variant in children: a prospective nationwide registry study*

Confidential: For Review Only

## Supplemental Methods

### Part 1: Data sources

In this study, we utilized the Norwegian preparedness registry (Beredt C19) to retrieve and link nation-wide individual-level data originating from the sources listed in Supplementary Table 3.

Table 1. Data sources in Beredt C19 used in this study and information obtained from each source.

| Name of data source                                         | Information obtained                                                                                                                                                                                                                                                                                                                                                                                                                                                                                                                                                                                                                                                                                                                       |
|-------------------------------------------------------------|--------------------------------------------------------------------------------------------------------------------------------------------------------------------------------------------------------------------------------------------------------------------------------------------------------------------------------------------------------------------------------------------------------------------------------------------------------------------------------------------------------------------------------------------------------------------------------------------------------------------------------------------------------------------------------------------------------------------------------------------|
| The National Population Register                            | Resident of Norway November 1 <sup>st</sup> 2021<br>Age<br>Sex<br>Municipality of residence<br>Country of birth<br>Parents' country of birth                                                                                                                                                                                                                                                                                                                                                                                                                                                                                                                                                                                               |
| The Norway Control and Payment of Health Reimbursement      | All physical and electronic consultations with all general practitioners<br>Date of consultation                                                                                                                                                                                                                                                                                                                                                                                                                                                                                                                                                                                                                                           |
| The Norwegian Surveillance System for Communicable Diseases | Date of sample of SARS-CoV-2 positive test<br>Classification of SARS-CoV-2 variants by targeted commercial or in-house PCR analyses for variant detection, Sanger sequencing of selected parts of the viral genome or whole genome sequencing.<br><br>For continuous surveillance purposes, 25% of SARS-CoV-2 positive samples or up to 100 samples per week per local laboratory is sent to a reference laboratory for whole genome sequencing. When Omicron emerged in Norway in late November 2021, the laboratories were requested to perform variant analyses locally on all positive samples. If this was not possible for capacity reasons, samples suspected to contain the Omicron variant were prioritized for variant analyses. |
| The National Immunization Register                          | Vaccination status by January 23rd, 2022<br><br>There is yet no recommended general vaccination for children below 12 years of age.                                                                                                                                                                                                                                                                                                                                                                                                                                                                                                                                                                                                        |

---

Information was linked at the individual level using the unique personal identification number (encrypted version) provided to every Norwegian resident at birth or upon immigration.

---

## Part 2: Statistical methods

Our empirical strategy is:

$$y_{i,w} = \theta_w + \theta_i + D_{\delta,i} \sum_{k=-5, k \neq -1}^{k=5} \delta_{k(i,w)} \alpha_k + D_{\sigma,i} \sum_{k=-5, k \neq -1}^{k=5} \sigma_{k(i,w)} \beta_k + \epsilon_{i,w}$$

Here  $y_{i,w}$  is the outcome in week  $w$  for individual  $i$ .  $D_{\delta,i}$  is a dummy indicating whether individual  $i$  was infected with the Delta virus in our study period, while  $D_{\sigma,i}$  is a dummy indicating whether individual  $i$  was infected with the omicron virus.  $\delta_k$  is a set of time variables, indicating that there are  $k$  weeks relative to the week in which the individual got infected with the delta virus. Similarly,  $\sigma_k$  indicates that there are  $k$  weeks relative to the week in which the individual got infected with the omicron virus.  $\theta_w$  are event-specific fixed effects for calendar week  $w$ ,  $\theta_i$  denotes background characteristics for individual  $i$  including gender, age dummies, parental country background and the child's country background, as well as municipality fixed effects.  $\epsilon_{i,w}$  is the usual standard error clustered at the municipality level.

Our primary parameters of interests are the  $\alpha_k$  and  $\beta_k$  attached to the event time dummies. These will capture the changes in our outcome variable among the children infected with delta and omicron relative to the comparison group. The coefficients for  $k < 0$  indicate the pre-trends prior to infection time, while  $k > 0$  describe how the outcome changes after getting infected with either delta or omicron virus.

Supplemental Results

Supplemental Figure 1: The development of delta and omicron cases in the estimated sample, week 48, 2021 – week 3, 2022. Share of sequenced samples with confirmed delta, omicron, and other results.

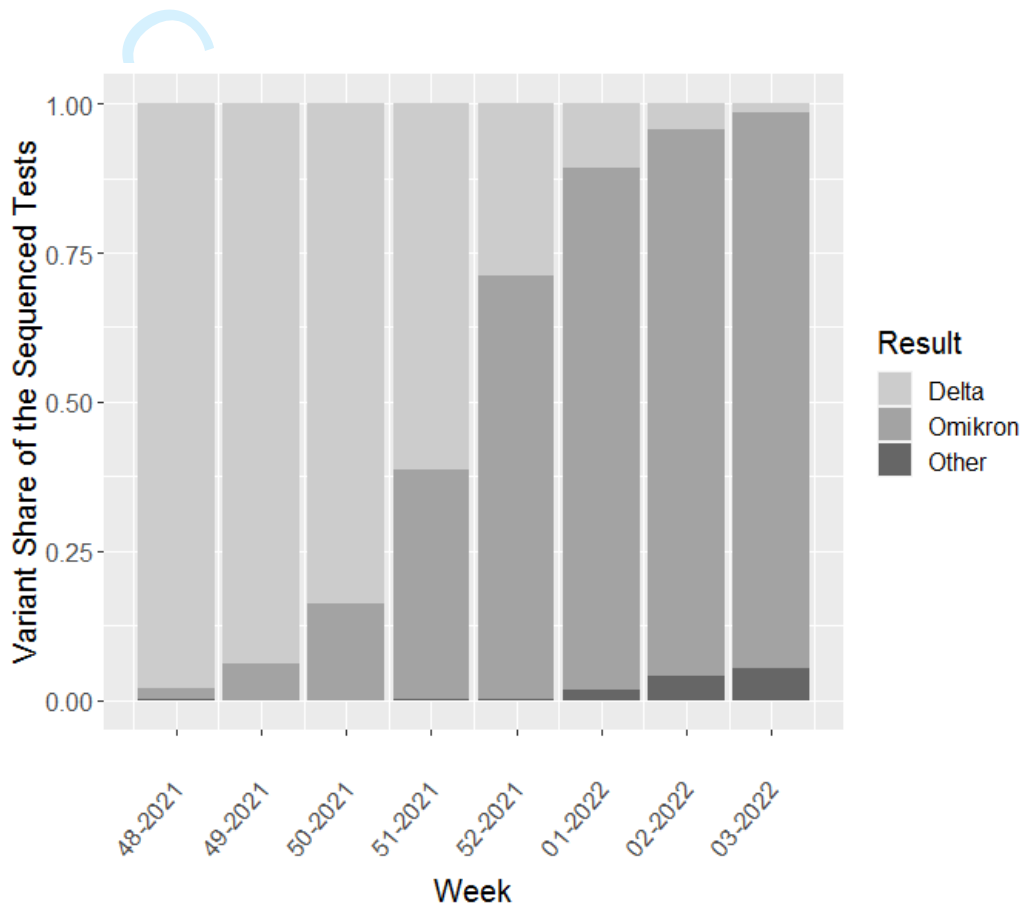

Supplemental Table 2: Descriptive statistics of the estimated sample

| Relative week | Delta                            |                  |                              | Omicron                          |                  |                           |
|---------------|----------------------------------|------------------|------------------------------|----------------------------------|------------------|---------------------------|
|               | Person-weeks with GP Appointment | Persons infected | Fraction with GP appointment | Person-weeks with GP appointment | Persons infected | Share with GP appointment |
| -5            | 19                               | 692              | 0.03                         | 145                              | 4,975            | 0.03                      |
| -4            | 55                               | 1,622            | 0.03                         | 176                              | 6,126            | 0.03                      |
| -3            | 113                              | 3,452            | 0.03                         | 147                              | 6,600            | 0.02                      |
| -2            | 187                              | 7,445            | 0.03                         | 120                              | 6,902            | 0.02                      |
| -1            | 259                              | 11,636           | 0.02                         | 125                              | 7,024            | 0.02                      |
| 0             | 2,285                            | 14,369           | 0.16                         | 846                              | 7,046            | 0.12                      |
| 1             | 1,795                            | 14,351           | 0.13                         | 674                              | 6,263            | 0.11                      |
| 2             | 335                              | 14,177           | 0.02                         | 136                              | 4,133            | 0.03                      |
| 3             | 282                              | 13,677           | 0.02                         | 60                               | 2,071            | 0.03                      |
| 4             | 304                              | 12,747           | 0.02                         | 17                               | 920              | 0.02                      |

Supplemental Table 3: Event study estimates of the effect of relative week according to week Delta and Omicron variant on GP use from the 29<sup>th</sup> of November 2021 until 23<sup>rd</sup> of January 2022.

| Relative Week                                                                                                                                                                                                                                                                                           | OR   | Std. Err. | P-value | Lower CI | Upper CI |
|---------------------------------------------------------------------------------------------------------------------------------------------------------------------------------------------------------------------------------------------------------------------------------------------------------|------|-----------|---------|----------|----------|
| <b>Omicron</b>                                                                                                                                                                                                                                                                                          |      |           |         |          |          |
| Week -5                                                                                                                                                                                                                                                                                                 | 1.20 | 0.10      | 0.03    | 1.02     | 1.42     |
| Week -4                                                                                                                                                                                                                                                                                                 | 1.02 | 0.11      | 0.86    | 0.83     | 1.25     |
| Week -3                                                                                                                                                                                                                                                                                                 | 1.07 | 0.08      | 0.37    | 0.93     | 1.23     |
| Week -2                                                                                                                                                                                                                                                                                                 | 0.97 | 0.08      | 0.75    | 0.83     | 1.15     |
| Week -1                                                                                                                                                                                                                                                                                                 | 0.91 | 0.08      | 0.27    | 0.77     | 1.08     |
| Week 0                                                                                                                                                                                                                                                                                                  | 6.67 | 0.69      | 0.00    | 5.45     | 8.18     |
| Week 1                                                                                                                                                                                                                                                                                                  | 5.51 | 0.72      | 0.00    | 4.26     | 7.12     |
| Week 2                                                                                                                                                                                                                                                                                                  | 1.51 | 0.12      | 0.00    | 1.29     | 1.77     |
| Week 3                                                                                                                                                                                                                                                                                                  | 1.32 | 0.15      | 0.01    | 1.06     | 1.64     |
| Week 4                                                                                                                                                                                                                                                                                                  | 0.86 | 0.29      | 0.65    | 0.44     | 1.68     |
| <b>Delta</b>                                                                                                                                                                                                                                                                                            |      |           |         |          |          |
| Week -5                                                                                                                                                                                                                                                                                                 | 0.58 | 0.37      | 0.39    | 0.16     | 2.04     |
| Week -4                                                                                                                                                                                                                                                                                                 | 0.97 | 0.24      | 0.90    | 0.60     | 1.57     |
| Week -3                                                                                                                                                                                                                                                                                                 | 1.18 | 0.18      | 0.27    | 0.88     | 1.60     |
| Week -2                                                                                                                                                                                                                                                                                                 | 1.20 | 0.11      | 0.04    | 1.01     | 1.44     |
| Week -1                                                                                                                                                                                                                                                                                                 | 0.96 | 0.07      | 0.63    | 0.83     | 1.12     |
| Week 0                                                                                                                                                                                                                                                                                                  | 8.19 | 0.52      | 0.00    | 7.24     | 9.27     |
| Week 1                                                                                                                                                                                                                                                                                                  | 7.10 | 0.93      | 0.00    | 5.50     | 9.17     |
| Week 2                                                                                                                                                                                                                                                                                                  | 1.39 | 0.08      | 0.00    | 1.24     | 1.56     |
| Week 3                                                                                                                                                                                                                                                                                                  | 1.26 | 0.08      | 0.00    | 1.11     | 1.42     |
| Week 4                                                                                                                                                                                                                                                                                                  | 1.34 | 0.08      | 0.00    | 1.19     | 1.50     |
| Note: Regression results from the main specification using a Logit model. Number of person weeks = 4,907,584. We included controls for year of birth, calendar week, region of residence, country of birth, sex and parents' country of birth. Standard errors are clustered at the municipality level. |      |           |         |          |          |

Supplemental Table 4: Event study estimates from the sensitivity analysis of the effect of relative week according to week Delta and Omicron variant on GP use from the 15<sup>th</sup> of November 2021 until 6<sup>th</sup> of February 2022.

| Relative Week                                                                                                                                                                                                                                                                                             | OR   | Std. Err. | P-value | Lower CI | Upper CI |
|-----------------------------------------------------------------------------------------------------------------------------------------------------------------------------------------------------------------------------------------------------------------------------------------------------------|------|-----------|---------|----------|----------|
| <b>Omicron</b>                                                                                                                                                                                                                                                                                            |      |           |         |          |          |
| Week -5                                                                                                                                                                                                                                                                                                   | 1.21 | 0.06      | 0.00    | 1.09     | 1.33     |
| Week -4                                                                                                                                                                                                                                                                                                   | 1.01 | 0.11      | 0.90    | 0.82     | 1.26     |
| Week -3                                                                                                                                                                                                                                                                                                   | 1.10 | 0.08      | 0.23    | 0.94     | 1.28     |
| Week -2                                                                                                                                                                                                                                                                                                   | 0.95 | 0.08      | 0.54    | 0.81     | 1.12     |
| Week -1                                                                                                                                                                                                                                                                                                   | 0.95 | 0.07      | 0.48    | 0.81     | 1.10     |
| Week 0                                                                                                                                                                                                                                                                                                    | 6.37 | 0.62      | 0.00    | 5.26     | 7.71     |
| Week 1                                                                                                                                                                                                                                                                                                    | 5.18 | 0.77      | 0.00    | 3.86     | 6.94     |
| Week 2                                                                                                                                                                                                                                                                                                    | 1.42 | 0.10      | 0.00    | 1.24     | 1.62     |
| Week 3                                                                                                                                                                                                                                                                                                    | 1.47 | 0.11      | 0.00    | 1.27     | 1.70     |
| Week 4                                                                                                                                                                                                                                                                                                    | 1.32 | 0.13      | 0.01    | 1.08     | 1.60     |
| <b>Delta</b>                                                                                                                                                                                                                                                                                              |      |           |         |          |          |
| Week -5                                                                                                                                                                                                                                                                                                   | 0.95 | 0.17      | 0.76    | 0.66     | 1.35     |
| Week -4                                                                                                                                                                                                                                                                                                   | 0.93 | 0.09      | 0.45    | 0.77     | 1.12     |
| Week -3                                                                                                                                                                                                                                                                                                   | 1.02 | 0.08      | 0.79    | 0.88     | 1.18     |
| Week -2                                                                                                                                                                                                                                                                                                   | 1.00 | 0.06      | 0.98    | 0.90     | 1.12     |
| Week -1                                                                                                                                                                                                                                                                                                   | 0.92 | 0.05      | 0.11    | 0.84     | 1.02     |
| Week 0                                                                                                                                                                                                                                                                                                    | 8.19 | 0.54      | 0.00    | 7.20     | 9.32     |
| Week 1                                                                                                                                                                                                                                                                                                    | 7.26 | 0.93      | 0.00    | 5.64     | 9.34     |
| Week 2                                                                                                                                                                                                                                                                                                    | 1.35 | 0.08      | 0.00    | 1.20     | 1.52     |
| Week 3                                                                                                                                                                                                                                                                                                    | 1.27 | 0.07      | 0.00    | 1.15     | 1.41     |
| Week 4                                                                                                                                                                                                                                                                                                    | 1.33 | 0.07      | 0.00    | 1.20     | 1.48     |
| Note: Regression results from the sensitivity analysis using a Logit model. Number of person weeks = 6,645,376. We included controls for year of birth, calendar week, region of residence, country of birth, sex and parents' country of birth. Standard errors are clustered at the municipality level. |      |           |         |          |          |



# BMJ Paediatrics Open

## General practitioner visits after SARS-CoV-2 omicron compared to the delta variant in children: a prospective nationwide registry study

|                               |                                                                                                                                                                                                                                                                                                                                                                                                                                                         |
|-------------------------------|---------------------------------------------------------------------------------------------------------------------------------------------------------------------------------------------------------------------------------------------------------------------------------------------------------------------------------------------------------------------------------------------------------------------------------------------------------|
| Journal:                      | <i>BMJ Paediatrics Open</i>                                                                                                                                                                                                                                                                                                                                                                                                                             |
| Manuscript ID                 | bmjpo-2022-001502.R1                                                                                                                                                                                                                                                                                                                                                                                                                                    |
| Article Type:                 | Original research                                                                                                                                                                                                                                                                                                                                                                                                                                       |
| Date Submitted by the Author: | 03-May-2022                                                                                                                                                                                                                                                                                                                                                                                                                                             |
| Complete List of Authors:     | Arntzen, Sigurd Storehaug; Norwegian Institute of Public Health<br>Gjefsen, Hege Marie; Norwegian Institute of Public Health<br>Telle, Kjetil Elias; Norwegian Institute of Public Health<br>Magnusson, Karin; Norwegian Institute of Public Health<br>Stordal, Ketil; Norwegian Institute of Public Health<br>Håberg, Siri; Norwegian Institute of Public Health, Institute Management and Staff<br>Kinge, Jonas; Norwegian Institute of Public Health |
| Keywords:                     | COVID-19                                                                                                                                                                                                                                                                                                                                                                                                                                                |
|                               |                                                                                                                                                                                                                                                                                                                                                                                                                                                         |

SCHOLARONE™  
Manuscripts

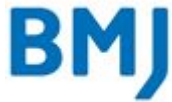

I, the Submitting Author has the right to grant and does grant on behalf of all authors of the Work (as defined in the below author licence), an exclusive licence and/or a non-exclusive licence for contributions from authors who are: i) UK Crown employees; ii) where BMJ has agreed a CC-BY licence shall apply, and/or iii) in accordance with the terms applicable for US Federal Government officers or employees acting as part of their official duties; on a worldwide, perpetual, irrevocable, royalty-free basis to BMJ Publishing Group Ltd ("BMJ") its licensees and where the relevant Journal is co-owned by BMJ to the co-owners of the Journal, to publish the Work in this journal and any other BMJ products and to exploit all rights, as set out in our [licence](#).

The Submitting Author accepts and understands that any supply made under these terms is made by BMJ to the Submitting Author unless you are acting as an employee on behalf of your employer or a postgraduate student of an affiliated institution which is paying any applicable article publishing charge ("APC") for Open Access articles. Where the Submitting Author wishes to make the Work available on an Open Access basis (and intends to pay the relevant APC), the terms of reuse of such Open Access shall be governed by a Creative Commons licence – details of these licences and which [Creative Commons](#) licence will apply to this Work are set out in our licence referred to above.

Other than as permitted in any relevant BMJ Author's Self Archiving Policies, I confirm this Work has not been accepted for publication elsewhere, is not being considered for publication elsewhere and does not duplicate material already published. I confirm all authors consent to publication of this Work and authorise the granting of this licence.

1  
2  
3 **General practitioner visits after SARS-CoV-2 omicron compared to the delta variant in**  
4 **children: a prospective nationwide registry study**  
5  
6

7 Sigurd Storehaug Arntzen, MPhil<sup>1</sup>, Hege Marie Gjefsen, PhD<sup>1</sup>, Kjetil Elias Telle, PhD<sup>1</sup>,  
8 Karin Magnusson, PhD<sup>1</sup>, Ketil Størdal, MD PhD<sup>2</sup>, Siri Håberg, MD PhD<sup>3</sup>, Jonas Minet  
9 Kinge, PhD<sup>1,3,4</sup>  
10

11  
12 <sup>1</sup> Cluster for Health Services Research, Norwegian Institute of Public Health

13 <sup>2</sup> Division of Paediatric and Adolescent Medicine, University of Oslo

14 <sup>3</sup> Centre for Fertility and Health, Norwegian Institute of Public Health

15 <sup>4</sup> Department of Health Management and Health Economics, University of Oslo  
16  
17

18 **Address correspondence to:** Jonas Minet Kinge, Norwegian Institute of Public Health,  
19 Postboks 222, Skøyen, N-0213 Oslo  
20 E-mail: [jonas.minet.kinge@fhi.no](mailto:jonas.minet.kinge@fhi.no)  
21  
22

23  
24 **Conflict of Interest Disclosures (includes financial disclosures):** The authors have no  
25 example conflicts of interest to disclose.  
26  
27

28 **Funding/Support: Funding:** The study was internally funded by the Norwegian Institute of  
29 Public Health and externally by the Research Council of Norway (project no 262700). The  
30 funding sources had no influence over the design and conduct of the study; collection,  
31 management, analysis, and interpretation of the data; preparation, review, or approval of the  
32 manuscript; or decision to submit the manuscript for publication.  
33  
34  
35  
36  
37  
38  
39  
40  
41  
42  
43  
44  
45  
46  
47  
48  
49  
50  
51  
52  
53  
54  
55  
56  
57  
58  
59  
60

1  
2  
3  
4  
5  
6  
7  
8  
9 **What is already known on this topic**

10  
11 SARS-CoV-2 in children is known to lead to an immediate increase in primary care  
12 utilization for 1-2 weeks after a positive test, before quickly falling back to pre-infection  
13 utilization levels. The difference in primary care utilization following infection with the delta  
14 and omicron virus variants is unknown.  
15  
16

17 **What this study adds**

18  
19 A sudden increase in primary care use was observed in children who tested positive for  
20 SARS-CoV-2 in the two weeks after the test. After the first two weeks, the primary care  
21 utilization returned to pre-infection levels.  
22

23 The increase in primary care utilization was higher for children infected with the delta than  
24 the omicron variant. Compared to the delta variant, the omicron variant is likely to result in  
25 less pressure on primary care services for infected children.  
26  
27  
28  
29  
30  
31  
32  
33  
34  
35  
36  
37  
38  
39  
40  
41  
42  
43  
44  
45  
46  
47  
48  
49  
50  
51  
52  
53  
54  
55  
56  
57  
58  
59  
60

**Abstract:**

**Background:** SARS-CoV-2 infection in children is followed by an immediate increase in primary care utilization. The difference in utilization following infection with the delta and omicron virus variants is unknown.

**Objectives:** To study whether general practitioner (GP) contacts are different in children infected with the omicron vs delta variant, for up to five weeks after the infection.

**Setting:** Primary care

**Participants:** All residents in Norway aged 0-10. After excluding 47,683 children with a positive test where the virus variant was not identified as delta or omicron and 474 children who were vaccinated, the primary study population consisted of 613,448 children.

**Main outcome measures:** GP visit

**Methods:** We estimated the difference in the weekly share visiting the GP after being infected with the delta or omicron variant to those in the study population who were either not tested or who tested negative, using an event-study design, controlling for calendar week of consultation, municipality fixed effects and sociodemographic factors in multivariate logistic regressions.

**Results:** Compared with pre-infection, increased GP utilization was found for children 1 and 2 weeks after testing positive for the omicron variant, with an odds ratio (OR) of 6.7 (Std.err: 0.69) in the first week and 5.5 (0.72) in the second. This increase was more pronounced for children with the delta variant, with an OR of 8.2 (0.52) in the first week and 7.1 (0.93) in the second. After 2 weeks, the GP utilization returned to pre-infection levels.

**Conclusion:** The omicron variant is likely to result in less pressure on primary health care services for children, compared with the delta variant.

## Introduction

SARS-CoV-2 for children is often referred to as leading to milder symptoms than in adults and recent studies found no increase in specialist care in children following infection.<sup>1 2</sup> However, recent reports discuss whether the omicron variant might cause more severe symptoms than the delta variant in children.<sup>3 4</sup>

Survey data can be used to determine patterns of health care need following infection, however, reporting and response bias may affect the accuracy of the estimates. Except for a few studies using registry data from a period dominated by delta and other earlier variants, little is known about the impact of SARS-CoV-2 on post-covid health care utilization in children<sup>2</sup>. Furthermore, we also do not know whether healthcare use among children and adolescents increases after initial omicron infection and whether this increase, if any, is comparable to the increase in utilization after infection with the delta variant. Such knowledge could be used to upscale or downscale the health care services.

Because the omicron variant has been found to cause less severe symptoms than the delta variant in adults, we hypothesized that a comparable pattern would be found for children. The aim of this analysis was to compare general practitioner (GP) contacts among children in the five weeks after being infected with the omicron or delta variants.

## Methods

Data used for this project was from the Emergency Preparedness Register (Beredt C19). The establishment of an emergency preparedness register forms part of the legally mandated responsibilities of the Norwegian Institute of Public Health during epidemics. The Ethics Committee of South-East Norway confirmed (4 June 2020, #153204) that external ethical board review was not required.

### *Data Sources*

To estimate the share of children aged 0-10 years old visiting the GP after being infected with delta or omicron variant we used population wide longitudinal registry data from Norway. BeredtC19 is an emergency preparedness register that aims to rapidly provide ongoing overview and knowledge of the prevalence, causal relationships, and consequences of the COVID-19 epidemic in Norway. It includes information from various data sources that are updated daily, including the Norwegian surveillance system for communicable diseases (all testing and screening for SARS-CoV-2), the National Population Register (age, sex, country of birth, the National Immunization Register (vaccination status), and the Norway Control and Payment of Health Reimbursement (all physical and electronic consultations with all general practitioners). A more in-depth summary of the data sources used for our analysis are available in the Appendix Supplementary Table 1.

### *Study Population*

We followed all Norwegian residents aged 0-10 years from the 29<sup>th</sup> of November 2021 until 23<sup>rd</sup> of January 2022. Figure 1 shows the share of the sequenced PCR tests that were delta or omicron variant from the 29<sup>th</sup> of November until the 23<sup>rd</sup> of January. Children who tested positive but whose tests were not sequenced, and children who had been vaccinated, were excluded from the analysis.

The categorical outcome variable for GP contact was set to 1 if the individual had at least one physical- or e-consultation with a GP in a week, and 0 otherwise. In Norway, consultations with the GP are free for children aged below 16. The GPs serve as the first line in the health

care services, prescribing medicines and performing simple procedures, and referring patients to further care when necessary.

### *Statistical design*

Multivariate logistic regression was used to estimate adjusted odds ratios (aOR) with 95% confidence intervals (CI) for GP consultations. Exploiting the longitudinal nature of the data, we used an event-study design<sup>5</sup>, controlling for calendar week of consultation, municipality fixed effects and sociodemographic characteristics. The temporal aORs of being infected by omicron and delta were estimated from 5 weeks before to 4 weeks after the week 0 of infection. We regress weeks to and from confirmed positive test on binary GP visits using:

$$y_{iw} = \theta_w + \theta_i + \sum_{k=-5, k \neq -1}^{k=5} \delta_{k(iw)} \alpha_k + \sum_{k=-5, k \neq -1}^{k=5} \sigma_{k(iw)} \beta_k + \epsilon_{iw}$$

Where  $y_{iw}$  is the outcome for individual  $i$  in week  $w$ .  $\delta_k$  is a set of time variables, indicating that there are  $k$  weeks relative to the week in which the individual got infected with the delta virus. Similarly,  $\sigma_k$  indicates that there are  $k$  weeks relative to the week in which the individual got infected with the omicron virus.  $\theta_w$  are event-specific fixed effects for calendar week  $w$ ,  $\theta_i$  denotes background characteristics for individual  $i$  including gender, age dummies, parental country background and the child's country background, as well as municipality fixed effects.  $\epsilon_{iw}$  is the standard error clustered at the municipality level. Our primary parameters of interests are the  $\alpha_k$  and  $\beta_k$  attached to the event time dummies. These will capture the changes in our outcome variable among the children infected with delta and omicron relative to the comparison group consisting of uninfected or non-tested children.

The coefficients for  $k < 0$  indicate the pre-trends prior to infection time, while  $k > 0$  describe how the outcome changes after getting infected with either delta or omicron virus. Hence, the



1  
2  
3 event-study allows for testing whether infected children followed the same patterns for GP  
4 visits as the noninfected. The reference category was 1 week prior to infection and  
5  
6 noninfected individuals were included as controls.  
7  
8  
9

10  
11  
12 In the Online Appendix we present robustness checks of our results by varying the time  
13 period of our analysis.  
14  
15  
16

### 17 18 19 *Patient and public involvement*

20  
21 No patients were involved in setting the research question or the outcome measures, nor were  
22 they involved in developing plans for recruitment, design, or implementation of the study. No  
23 patients were asked to advise on interpretation or writing up of results. There are no plans to  
24 disseminate the results of the research to study participants or the relevant patient community.  
25  
26  
27  
28  
29  
30  
31

### 32 33 **Results**

34  
35 In total, 661,587 children, aged 0–10 years, were residing in Norway in the study period.  
36  
37 After excluding 474 children who were vaccinated and 47,665 children with positive tests  
38 during the study period where the virus variant was not identified as delta or omicron, the  
39 primary study population consisted of 613,448 children comprising 4,907,584 person-weeks.  
40  
41  
42  
43  
44  
45

46  
47 Figure 1 shows that delta was the dominant virus variant at the beginning of our study period,  
48 while omicron was the dominant variant at the end of our study period. Persons with omicron  
49 were older and more often born abroad than persons with delta, though the sex distribution  
50 was similar (Table 1).  
51  
52  
53  
54  
55  
56  
57  
58  
59  
60

1  
2  
3 Table 2 shows descriptive statistics of the estimated sample, indicating that the fraction that  
4 visited the GP in the weeks before infection was similar for the children later infected with  
5 omicron and delta, and for those who either were not infected or not tested for SARS-CoV-2.  
6  
7  
8  
9

10  
11  
12 The event study plot showing higher GP utilization following omicron, compared with delta  
13 (Figure 2). The aORs of 8.19 (std.err: 0.52) in the first and 7.10 (0.93) in the second week  
14 after delta were higher than comparable estimates for omicron of 6.67 (0.69) and 5.51 (0.72)  
15 in week one and two respectively. Higher GP utilization was also found for children 4 weeks  
16 after testing positive for both omicron and delta. Higher utilization was also found five weeks  
17 after testing positive for delta but returned to pre-infection levels in week 5 for omicron cases  
18 (see Table 3 for details). Results from robustness control were similar (Supplemental Table  
19 2).  
20  
21  
22  
23  
24  
25  
26  
27  
28  
29  
30  
31  
32

### 33 Discussion

34  
35 In this study of 613,448 Norwegian children aged 0-10 years, we found increased GP  
36 utilization for children 1 and 2 weeks after testing positive for the omicron variant, with  
37 similar and more pronounced increases for children with the delta variant. Our findings  
38 suggest that omicron will place less pressure on the primary care services per case. However,  
39 given the higher transmissibility of the omicron than the delta variant it can still lead to a high  
40 burden on the health care system.<sup>6</sup>  
41  
42  
43  
44  
45  
46  
47  
48  
49  
50

51 We could find no study for comparison of our findings, i.e. to our knowledge, the present  
52 study is the first to shed light on healthcare use following the omicron vs delta variant in  
53 children.  
54  
55  
56  
57  
58  
59  
60

1  
2  
3 A number of reports of the omicron variant in adults suggests less serious illness<sup>7</sup>, i.e. another  
4 possible interpretation of our findings may be that omicron is perceived as less severe,  
5 compared with the delta variant, lowering the parents' perceived need to seek healthcare after  
6 omicron than after delta. However, a key strength of our analysis is that both delta and  
7 omicron were circulating during our study period, and we adjusted for calendar week in our  
8 regression models. Hence, it is less likely that the results are driven by general changes in the  
9 inclination to contact the GP. In addition, it includes data covering all children residing in  
10 Norway, which reduce attrition and sample selection bias.  
11  
12  
13  
14  
15  
16  
17  
18  
19  
20  
21  
22  
23

24 Based on national recommendations in Norway, healthy children below age 12 are mostly  
25 unvaccinated.<sup>8</sup> PCR tests are freely available and a proportion of these are screened for  
26 variants of concern. Several of the most populous municipalities in Norway had implemented  
27 mass testing in the schools before the first case of omicron was detected in Norway in late  
28 November 2021. However, throughout the study period, it was the norm that all positive  
29 rapid antigen home tests had to be confirmed with a PCR-test. The increasing use of rapid  
30 antigen home tests is therefore unlikely to seriously bias our estimates.  
31  
32  
33  
34  
35  
36  
37  
38  
39  
40  
41

42 A limitation of the study is that asymptomatic children might have been less likely to have a  
43 PCR-test. If, for example, asymptomatic SARS-CoV-2 infection was more common for the  
44 omicron than the delta variant, we might have underestimated the difference between them.  
45 Also, our findings may not be generalizable to countries without equal and free access to  
46 healthcare and PCR testing for SARS-CoV-2 for all inhabitants. Finally, for continuous  
47 surveillance purposes, 25% of SARS-CoV-2 positive samples or up to 100 samples per week  
48 per local laboratory is sent to a reference laboratory for whole genome sequencing. When  
49 omicron emerged in Norway in late November 2021, the laboratories were requested to  
50  
51  
52  
53  
54  
55  
56  
57  
58  
59  
60

perform variant analyses locally on all positive samples. If this was not possible for capacity reasons, samples suspected to contain the omicron variant was prioritized for variant analyses. This might have led to variation in the tests that were sequenced over time.

## Conclusion

Our findings show that per positive test in children aged 0 to 10 years, the omicron variant is likely to result in less pressure on the health care system than the delta variant. However, the omicron variant is still associated with increased utilization, and it can still lead to a high burden on the health care system when the community omicron cases are high.

## References:

1. Dhochak N, Singhal T, Kabra S, et al. Pathophysiology of COVID-19: why children fare better than adults? *The Indian Journal of Pediatrics* 2020;87(7):537-46.
2. Magnusson K, Skyrud KD, Suren P, et al. Healthcare use in 700 000 children and adolescents for six months after covid-19: before and after register based cohort study. *BMJ* 2022;376:e066809. doi: 10.1136/bmj-2021-066809
3. Kozlov M. Does Omicron hit kids harder? Scientists are trying to find out: Nature Web Site; 2022 [accessed 23.02. 2022].
4. Sigal A, Milo R, Jassat W. Estimating disease severity of Omicron and Delta SARS-CoV-2 infections. *Nature Reviews Immunology* 2022 doi: 10.1038/s41577-022-00720-5
5. Bailey MJ, Goodman-Bacon A. The War on Poverty's Experiment in Public Medicine: Community Health Centers and the Mortality of Older Americans. *American Economic Review* 2015;105(3):1067-104. doi: 10.1257/aer.20120070
6. Jørgensen SB, Nygård K, Kacelnik O, et al. Secondary Attack Rates for Omicron and Delta Variants of SARS-CoV-2 in Norwegian Households. *JAMA* 2022 doi: 10.1001/jama.2022.3780
7. Veneti L, Bøås H, Kristoffersen AB, et al. Reduced risk of hospitalisation among reported COVID-19 cases infected with the SARS-CoV-2 Omicron BA. 1 variant compared with the Delta variant, Norway, December 2021 to January 2022. *Eurosurveillance* 2022;27(4):2200077.
8. Coronavirus vaccine - information for the public: The Norwegian Institute of Public Health (NIPH); 2022 [updated 28.02.2022. Available from: <https://www.fhi.no/en/id/vaccines/coronavirus-immunisation-programme/coronavirus-vaccine/#vaccination-of-children-and-adolescents> accessed 01.03. 2022.

**Table 1: Summary statistics of the estimation sample**

|                                   | Omicron   | Delta     | Rest      |
|-----------------------------------|-----------|-----------|-----------|
| N                                 | 7,046     | 14,369    | 592,033   |
| Person-weeks                      | 56,368    | 114,952   | 4,736,264 |
| Age, mean (SD)                    | 6.1 (3.1) | 6.9 (2.8) | 5.1 (3.2) |
| Born Foreign Country, (%)         | 7.2       | 6.3       | 5.5       |
| Parents foreign Born Country, (%) | 53.7      | 43.0      | 38.8      |
| Boys, (%)                         | 51.3      | 51.4      | 51.3      |

Notes: Standard deviation in brackets

**Table 2: Descriptive statistics of the estimated sample**

| Relative week | Delta                            |                  |                              | Omicron                          |                  |                           |
|---------------|----------------------------------|------------------|------------------------------|----------------------------------|------------------|---------------------------|
|               | Person-weeks with GP Appointment | Persons infected | Fraction with GP appointment | Person-weeks with GP appointment | Persons infected | Share with GP appointment |
| -5            | 19                               | 692              | 0.03                         | 145                              | 4,975            | 0.03                      |
| -4            | 55                               | 1,622            | 0.03                         | 176                              | 6,126            | 0.03                      |
| -3            | 113                              | 3,452            | 0.03                         | 147                              | 6,600            | 0.02                      |
| -2            | 187                              | 7,445            | 0.03                         | 120                              | 6,902            | 0.02                      |
| -1            | 259                              | 11,636           | 0.02                         | 125                              | 7,024            | 0.02                      |
| 0             | 2,285                            | 14,369           | 0.16                         | 846                              | 7,046            | 0.12                      |
| 1             | 1,795                            | 14,351           | 0.13                         | 674                              | 6,263            | 0.11                      |
| 2             | 335                              | 14,177           | 0.02                         | 136                              | 4,133            | 0.03                      |
| 3             | 282                              | 13,677           | 0.02                         | 60                               | 2,071            | 0.03                      |
| 4             | 304                              | 12,747           | 0.02                         | 17                               | 920              | 0.02                      |

Table 3: Event study estimates of the effect of relative week according to week delta and omicron variant on GP use from the 29<sup>th</sup> of November 2021 until 23<sup>rd</sup> of January 2022.

| Relative Week                                                                                                                                                                                                                                                                                           | OR   | Std. Err. | P-value | Lower CI | Upper CI |
|---------------------------------------------------------------------------------------------------------------------------------------------------------------------------------------------------------------------------------------------------------------------------------------------------------|------|-----------|---------|----------|----------|
| <b>Omicron</b>                                                                                                                                                                                                                                                                                          |      |           |         |          |          |
| Week -5                                                                                                                                                                                                                                                                                                 | 1.20 | 0.10      | 0.03    | 1.02     | 1.42     |
| Week -4                                                                                                                                                                                                                                                                                                 | 1.02 | 0.11      | 0.86    | 0.83     | 1.25     |
| Week -3                                                                                                                                                                                                                                                                                                 | 1.07 | 0.08      | 0.37    | 0.93     | 1.23     |
| Week -2                                                                                                                                                                                                                                                                                                 | 0.97 | 0.08      | 0.75    | 0.83     | 1.15     |
| Week -1                                                                                                                                                                                                                                                                                                 | 0.91 | 0.08      | 0.27    | 0.77     | 1.08     |
| Week 0                                                                                                                                                                                                                                                                                                  | 6.67 | 0.69      | 0.00    | 5.45     | 8.18     |
| Week 1                                                                                                                                                                                                                                                                                                  | 5.51 | 0.72      | 0.00    | 4.26     | 7.12     |
| Week 2                                                                                                                                                                                                                                                                                                  | 1.51 | 0.12      | 0.00    | 1.29     | 1.77     |
| Week 3                                                                                                                                                                                                                                                                                                  | 1.32 | 0.15      | 0.01    | 1.06     | 1.64     |
| Week 4                                                                                                                                                                                                                                                                                                  | 0.86 | 0.29      | 0.65    | 0.44     | 1.68     |
| <b>Delta</b>                                                                                                                                                                                                                                                                                            |      |           |         |          |          |
| Week -5                                                                                                                                                                                                                                                                                                 | 0.58 | 0.37      | 0.39    | 0.16     | 2.04     |
| Week -4                                                                                                                                                                                                                                                                                                 | 0.97 | 0.24      | 0.90    | 0.60     | 1.57     |
| Week -3                                                                                                                                                                                                                                                                                                 | 1.18 | 0.18      | 0.27    | 0.88     | 1.60     |
| Week -2                                                                                                                                                                                                                                                                                                 | 1.20 | 0.11      | 0.04    | 1.01     | 1.44     |
| Week -1                                                                                                                                                                                                                                                                                                 | 0.96 | 0.07      | 0.63    | 0.83     | 1.12     |
| Week 0                                                                                                                                                                                                                                                                                                  | 8.19 | 0.52      | 0.00    | 7.24     | 9.27     |
| Week 1                                                                                                                                                                                                                                                                                                  | 7.10 | 0.93      | 0.00    | 5.50     | 9.17     |
| Week 2                                                                                                                                                                                                                                                                                                  | 1.39 | 0.08      | 0.00    | 1.24     | 1.56     |
| Week 3                                                                                                                                                                                                                                                                                                  | 1.26 | 0.08      | 0.00    | 1.11     | 1.42     |
| Week 4                                                                                                                                                                                                                                                                                                  | 1.34 | 0.08      | 0.00    | 1.19     | 1.50     |
| Note: Regression results from the main specification using a Logit model. Number of person weeks = 4,907,584. We included controls for year of birth, calendar week, region of residence, country of birth, sex and parents' country of birth. Standard errors are clustered at the municipality level. |      |           |         |          |          |

**Figure 1: The development of delta and omicron cases in the estimated sample, week 48, 2021 – week 3, 2022. Share of sequenced samples with confirmed delta, omicron, and other results.**  
[Figure1.pdf]

**Figure 2: Event-study analysis of pre- and post-SARS-COV-2 trends in odds ratios for GP utilization by variant**  
[Figure2.pdf]

Note: Estimates from logistic regression analysis on weekly data are reported. Adjusted odds ratios were estimated for indicator variables for relative week to omicron and delta and the omitted category defined as one week prior to infection, i.e week -1. Odds ratios were adjusted for age by including age indicators for 1 year age groups, sex, indicator for birth country and parental birth country, and municipality of residence. Standard errors are clustered at municipality level.

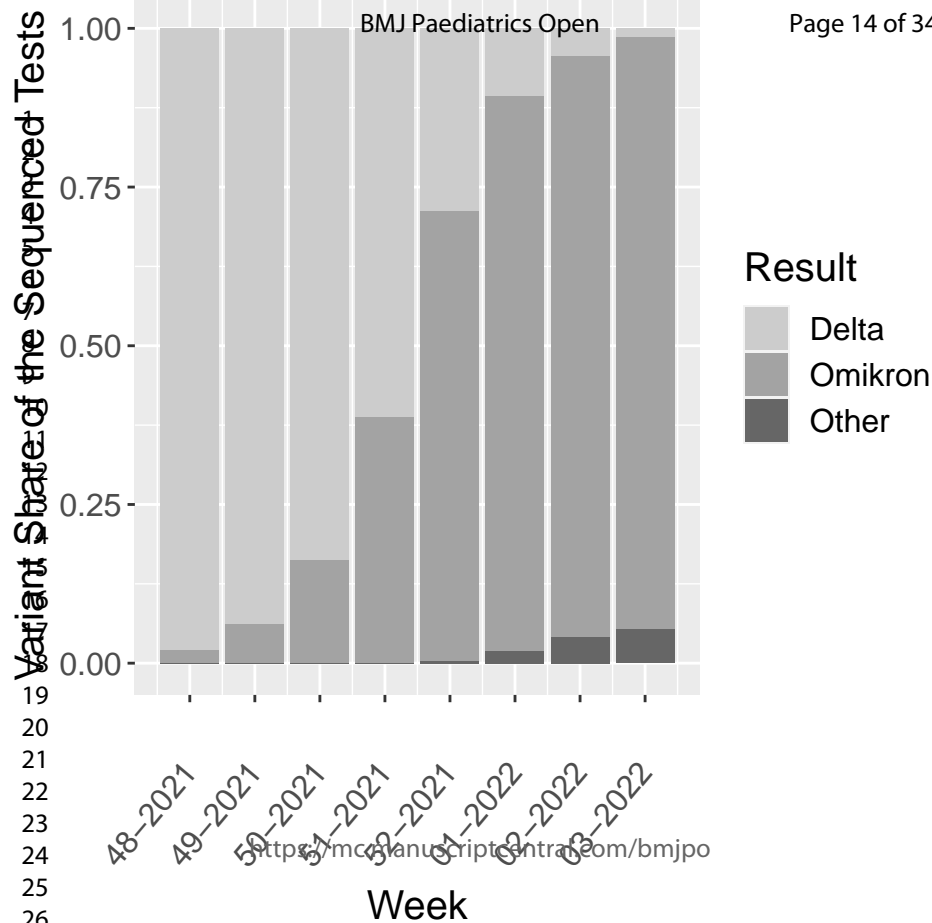

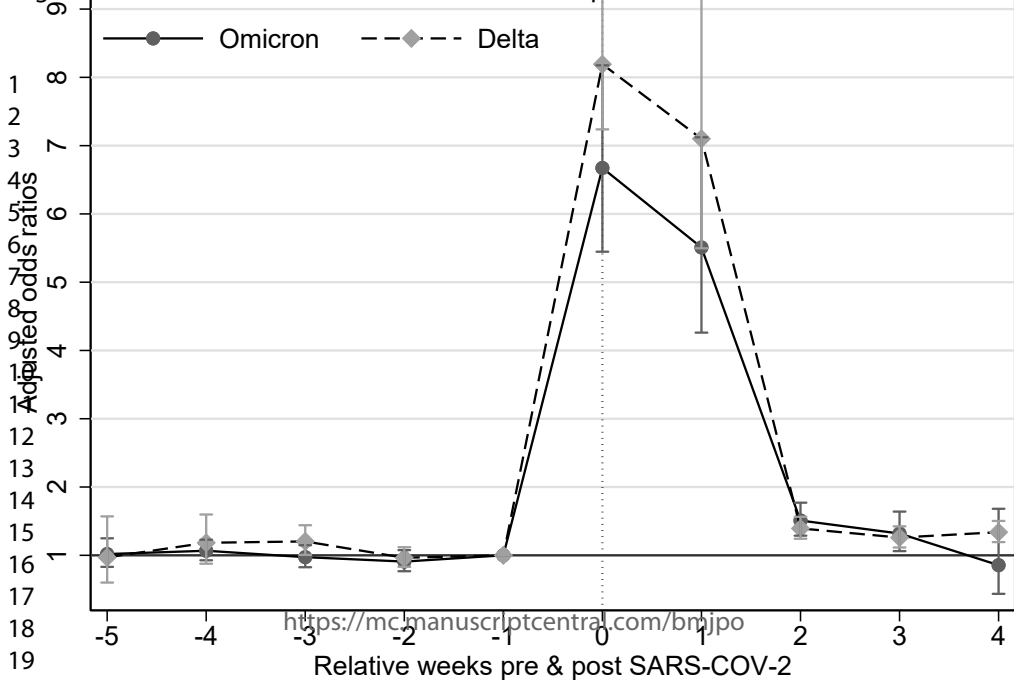



**Supplementary online content**

Arntzen et al. *General practitioner visits after SARS-CoV-2 Omicron compared to the Delta variant in children: a prospective nationwide registry study*

Confidential: For Review Only

## Supplemental Methods

### Part 1: Data sources

In this study, we utilized the Norwegian preparedness registry (Beredt C19) to retrieve and link nation-wide individual-level data originating from the sources listed in Supplementary Table 3.

Table 1. Data sources in Beredt C19 used in this study and information obtained from each source.

| Name of data source                                         | Information obtained                                                                                                                                                                                                                                                                                                                                                                                                                                                                                                                                                                                                                                                                                                                       |
|-------------------------------------------------------------|--------------------------------------------------------------------------------------------------------------------------------------------------------------------------------------------------------------------------------------------------------------------------------------------------------------------------------------------------------------------------------------------------------------------------------------------------------------------------------------------------------------------------------------------------------------------------------------------------------------------------------------------------------------------------------------------------------------------------------------------|
| The National Population Register                            | Resident of Norway November 1 <sup>st</sup> 2021<br>Age<br>Sex<br>Municipality of residence<br>Country of birth<br>Parents' country of birth                                                                                                                                                                                                                                                                                                                                                                                                                                                                                                                                                                                               |
| The Norway Control and Payment of Health Reimbursement      | All physical and electronic consultations with all general practitioners<br>Date of consultation                                                                                                                                                                                                                                                                                                                                                                                                                                                                                                                                                                                                                                           |
| The Norwegian Surveillance System for Communicable Diseases | Date of sample of SARS-CoV-2 positive test<br>Classification of SARS-CoV-2 variants by targeted commercial or in-house PCR analyses for variant detection, Sanger sequencing of selected parts of the viral genome or whole genome sequencing.<br><br>For continuous surveillance purposes, 25% of SARS-CoV-2 positive samples or up to 100 samples per week per local laboratory is sent to a reference laboratory for whole genome sequencing. When Omicron emerged in Norway in late November 2021, the laboratories were requested to perform variant analyses locally on all positive samples. If this was not possible for capacity reasons, samples suspected to contain the Omicron variant were prioritized for variant analyses. |
| The National Immunization Register                          | Vaccination status by January 23rd, 2022<br><br>There is yet no recommended general vaccination for children below 12 years of age.                                                                                                                                                                                                                                                                                                                                                                                                                                                                                                                                                                                                        |

---

Information was linked at the individual level using the unique personal identification number (encrypted version) provided to every Norwegian resident at birth or upon immigration.

---

Confidential: For Review Only

Supplemental Table 2: Event study estimates from the sensitivity analysis of the effect of relative week according to week Delta and Omicron variant on GP use from the 15<sup>th</sup> of November 2021 until 6<sup>th</sup> of February 2022.

| Relative Week                                                                                                                                                                                                                                                                                             | OR   | Std. Err. | P-value | Lower CI | Upper CI |
|-----------------------------------------------------------------------------------------------------------------------------------------------------------------------------------------------------------------------------------------------------------------------------------------------------------|------|-----------|---------|----------|----------|
| <b>Omicron</b>                                                                                                                                                                                                                                                                                            |      |           |         |          |          |
| Week -5                                                                                                                                                                                                                                                                                                   | 1.21 | 0.06      | 0.00    | 1.09     | 1.33     |
| Week -4                                                                                                                                                                                                                                                                                                   | 1.01 | 0.11      | 0.90    | 0.82     | 1.26     |
| Week -3                                                                                                                                                                                                                                                                                                   | 1.10 | 0.08      | 0.23    | 0.94     | 1.28     |
| Week -2                                                                                                                                                                                                                                                                                                   | 0.95 | 0.08      | 0.54    | 0.81     | 1.12     |
| Week -1                                                                                                                                                                                                                                                                                                   | 0.95 | 0.07      | 0.48    | 0.81     | 1.10     |
| Week 0                                                                                                                                                                                                                                                                                                    | 6.37 | 0.62      | 0.00    | 5.26     | 7.71     |
| Week 1                                                                                                                                                                                                                                                                                                    | 5.18 | 0.77      | 0.00    | 3.86     | 6.94     |
| Week 2                                                                                                                                                                                                                                                                                                    | 1.42 | 0.10      | 0.00    | 1.24     | 1.62     |
| Week 3                                                                                                                                                                                                                                                                                                    | 1.47 | 0.11      | 0.00    | 1.27     | 1.70     |
| Week 4                                                                                                                                                                                                                                                                                                    | 1.32 | 0.13      | 0.01    | 1.08     | 1.60     |
| <b>Delta</b>                                                                                                                                                                                                                                                                                              |      |           |         |          |          |
| Week -5                                                                                                                                                                                                                                                                                                   | 0.95 | 0.17      | 0.76    | 0.66     | 1.35     |
| Week -4                                                                                                                                                                                                                                                                                                   | 0.93 | 0.09      | 0.45    | 0.77     | 1.12     |
| Week -3                                                                                                                                                                                                                                                                                                   | 1.02 | 0.08      | 0.79    | 0.88     | 1.18     |
| Week -2                                                                                                                                                                                                                                                                                                   | 1.00 | 0.06      | 0.98    | 0.90     | 1.12     |
| Week -1                                                                                                                                                                                                                                                                                                   | 0.92 | 0.05      | 0.11    | 0.84     | 1.02     |
| Week 0                                                                                                                                                                                                                                                                                                    | 8.19 | 0.54      | 0.00    | 7.20     | 9.32     |
| Week 1                                                                                                                                                                                                                                                                                                    | 7.26 | 0.93      | 0.00    | 5.64     | 9.34     |
| Week 2                                                                                                                                                                                                                                                                                                    | 1.35 | 0.08      | 0.00    | 1.20     | 1.52     |
| Week 3                                                                                                                                                                                                                                                                                                    | 1.27 | 0.07      | 0.00    | 1.15     | 1.41     |
| Week 4                                                                                                                                                                                                                                                                                                    | 1.33 | 0.07      | 0.00    | 1.20     | 1.48     |
| Note: Regression results from the sensitivity analysis using a Logit model. Number of person weeks = 6,645,376. We included controls for year of birth, calendar week, region of residence, country of birth, sex and parents' country of birth. Standard errors are clustered at the municipality level. |      |           |         |          |          |

1  
2  
3 **General practitioner visits after SARS-CoV-2 Omicronomicron compared to the**  
4 **Deltadelta variant in children: a prospective nationwide registry study**  
5  
6

7 Sigurd Storehaug Arntzen, MPhil<sup>1</sup>, Hege Marie Gjefsen, PhD<sup>1</sup>, Kjetil Elias Telle, PhD<sup>1</sup>,  
8 Karin Magnusson, PhD<sup>1</sup>, Ketil Størdal, MD PhD<sup>2</sup>, Siri Håberg, MD PhD<sup>3</sup>, Jonas Minet  
9 Kinge, PhD<sup>1,3,4</sup>  
10

11  
12 <sup>1</sup> Cluster for Health Services Research, Norwegian Institute of Public Health

13 <sup>2</sup> Division of Paediatric and Adolescent Medicine, University of Oslo

14 <sup>3</sup> Centre for Fertility and Health, Norwegian Institute of Public Health

15 <sup>4</sup> Department of Health Management and Health Economics, University of Oslo  
16  
17

18 **Address correspondence to:** Jonas Minet Kinge, Norwegian Institute of Public Health,  
19 Postboks 222, Skøyen, N-0213 Oslo  
20 E-mail: jonas.minet.kinge@fhi.no  
21  
22

23  
24 **Conflict of Interest Disclosures (includes financial disclosures):** The authors have no  
25 example conflicts of interest to disclose.  
26  
27

28 **Funding/Support: Funding:** The study was internally funded by the Norwegian Institute of  
29 Public Health and externally by the Research Council of Norway (project no 262700). The  
30 funding sources had no influence over the design and conduct of the study; collection,  
31 management, analysis, and interpretation of the data; preparation, review, or approval of the  
32 manuscript; or decision to submit the manuscript for publication.  
33  
34  
35  
36  
37  
38  
39  
40  
41  
42  
43  
44  
45  
46  
47  
48  
49  
50  
51  
52  
53  
54  
55  
56  
57  
58  
59  
60

**Word Count: 508**

1  
2  
3 SARS-CoV-2 in children leads to milder symptoms than in adults.<sup>1</sup> However, recent reports  
4 discuss whether the omicron variant might cause more severe symptoms than the delta  
5 variant in children.<sup>2</sup> In Norway, general practitioners (GP) serve as the first line health  
6 service and are free for children aged below 16. Based on national recommendations, healthy  
7 children below age 12 are mostly unvaccinated.<sup>3</sup> PCR tests are freely available and a  
8 proportion of these are screened for variants.  
9

10  
11  
12  
13  
14  
15  
16  
17  
18  
19 The aim of this analysis was to compare GP contacts among children in the five weeks after  
20 being infected with omicron or delta variants.  
21  
22

23  
24  
25  
26 Using data from  
27  
28  
29  
30  
31  
32  
33  
34  
35  
36  
37  
38  
39  
40  
41  
42  
43  
44  
45  
46  
47  
48  
49  
50  
51  
52

### 53 What is already known on this topic

54  
55 SARS-CoV-2 in children is known to lead to an immediate increase in primary care  
56 utilization for 1-2 weeks after a positive test, before quickly falling back to pre-infection  
57 utilization levels. The difference in primary care utilization following infection with the delta  
58 and omicron virus variants is unknown.  
59  
60

1  
2  
3  
4 **What this study adds**  
5

6 A sudden increase in primary care use was observed in children who tested positive for  
7 SARS-CoV-2 in the two weeks after the test. After the first two weeks, the primary care  
8 utilization returned to pre-infection levels.

9 The increase in primary care utilization was higher for children infected with the delta than  
10 the omicron variant. Compared to the delta variant, the omicron variant is likely to result in  
11 less pressure on primary care services for infected children.  
12  
13  
14  
15  
16  
17  
18  
19  
20  
21  
22  
23  
24  
25  
26  
27  
28  
29  
30  
31  
32  
33  
34  
35  
36  
37  
38  
39  
40  
41  
42  
43  
44  
45  
46  
47  
48  
49  
50  
51  
52  
53  
54  
55  
56  
57  
58  
59  
60

**Abstract:**

**Background:** SARS-CoV-2 infection in children is followed by an immediate increase in primary care utilization. The difference in utilization following infection with the delta and omicron virus variants is unknown.

**Objectives:** To study whether general practitioner (GP) contacts are different in children infected with the omicron vs delta variant, for up to five weeks after the infection.

**Setting:** Primary care

**Participants:** All residents in Norway aged 0-10. After excluding 47,683 children with a positive test where the virus variant was not identified as delta or omicron and 474 children who were vaccinated, the primary study population consisted of 613,448 children.

**Main outcome measures:** GP visit

**Methods:** We estimated the difference in the weekly share visiting the GP after being infected with the delta or omicron variant to those in the study population who were either not tested or who tested negative, using an event-study design, controlling for calendar week of consultation, municipality fixed effects and sociodemographic factors in multivariate logistic regressions.

**Results:** Compared with pre-infection, increased GP utilization was found for children 1 and 2 weeks after testing positive for the omicron variant, with an odds ratio (OR) of 6.7 (Std.err: 0.69) in the first week and 5.5 (0.72) in the second. This increase was more pronounced for children with the delta variant, with an OR of 8.2 (0.52) in the first week and 7.1 (0.93) in the second. After 2 weeks, the GP utilization returned to pre-infection levels.

**Conclusion:** The omicron variant is likely to result in less pressure on primary health care services for children, compared with the delta variant.



## **Introduction**

SARS-CoV-2 for children is often referred to as leading to milder symptoms than in adults and recent studies found no increase in specialists care in children following infection.<sup>1 2</sup>

However, recent reports discuss whether the omicron variant might cause more severe symptoms than the delta variant in children.<sup>3 4</sup>

Survey data can be used to determine patterns of health care need following infection, however, reporting and response bias may affect the accuracy of the estimates. Except for a few studies using registry data from a period dominated by delta and other earlier variants, little is known about the impact of SARS-CoV-2 on post-covid health care utilization in children<sup>2</sup>. Furthermore, we also do not know whether healthcare use among children and adolescents increases after initial omicron infection and whether this increase, if any, is comparable to the increase in utilization after infection with the delta variant. Such knowledge could be used to upscale or downscale the health care services.

Because the omicron variant has been found to cause less severe symptoms than the delta variant in adults, we hypothesized that a comparable pattern would be found for children. The aim of this analysis was to compare general practitioner (GP) contacts among children in the five weeks after being infected with the omicron or delta variants.

## **Methods**

Data used for this project was from the Emergency Preparedness Register (Beredt C19). The establishment of an emergency preparedness register forms part of the legally mandated responsibilities of the Norwegian Institute of Public Health during epidemics. The Ethics Committee of South-East Norway confirmed (4 June 2020, #153204) that external ethical board review was not required.

1  
2  
3  
4  
5  
6  
7  
8  
9  
10  
11  
12  
13  
14  
15  
16  
17  
18  
19  
20  
21  
22  
23  
24  
25  
26  
27  
28  
29  
30  
31  
32  
33  
34  
35  
36  
37  
38  
39  
40  
41  
42  
43  
44  
45  
46  
47  
48  
49  
50  
51  
52  
53  
54  
55  
56  
57  
58  
59  
60

), we followed *Data Sources*

To estimate the share of children aged 0-10 years old visiting the GP after being infected with delta or omicron variant we used population wide longitudinal registry data from Norway. BeredtC19 is an emergency preparedness register that aims to rapidly provide ongoing overview and knowledge of the prevalence, causal relationships, and consequences of the COVID-19 epidemic in Norway. It includes information from various data sources that are updated daily, including the Norwegian surveillance system for communicable diseases (all testing and screening for SARS-CoV-2), the National Population Register (age, sex, country of birth, the National Immunization Register (vaccination status), and the Norway Control and Payment of Health Reimbursement (all physical and electronic consultations with all general practitioners). A more in-depth summary of the data sources used for our analysis are available in the Appendix Supplementary Table 1.

### *Study Population*

We followed all Norwegian residents aged 0-10 years from the 29<sup>th</sup> of November 2021 until 23<sup>rd</sup> of January 2022 (Supplemental Table 1). The outcome variable was defined as at least one physical- or e-consultation with a GP in a week. Figure 1 shows the share of the sequenced PCR tests that were delta or omicron variant from the 29<sup>th</sup> of November until the 23<sup>rd</sup> of January. Children who tested positive but whose tests were not sequenced, and children who had been vaccinated, were excluded from the analysis.

The categorical outcome variable for GP contact was set to 1 if the individual had at least one physical- or e-consultation with a GP in a week, and 0 otherwise. In Norway, consultations with the GP are free for children aged below 16. The GPs serve as the first line in the health

care services, prescribing medicines and performing simple procedures, and referring patients to further care when necessary.

### *Statistical design*

Multivariate logistic regression was used to estimate adjusted odds ratios (aOR) with 95% confidence intervals (CI) for GP consultations. Exploiting the longitudinal nature of the data, we used an event-study design, ~~controlling for calendar week of consultation, municipality fixed effects and sociodemographic controls.~~<sup>5</sup>, ~~controlling for calendar week of consultation, municipality fixed effects and sociodemographic characteristics.~~ The temporal aORs of being infected by omicron and delta were estimated from 5 weeks before to 4 weeks after the week 0 of infection. ~~(Supplemental Methods part 2).~~ ~~The~~ We regress weeks to and from confirmed positive test on binary GP visits using:

$$y_{iw} \equiv \theta_w + \theta_i + \sum_{k=-5, k \neq -1}^{k=5} \delta_{k(iw)} \alpha_k + \sum_{k=-5, k \neq -1}^{k=5} \sigma_{k(iw)} \beta_k + \epsilon_{iw}$$

Where  $y_{iw}$  is the outcome for individual  $i$  in week  $w$ .  $\delta_k$  is a set of time variables, indicating that there are  $k$  weeks relative to the week in which the individual got infected with the delta virus. Similarly,  $\sigma_k$  indicates that there are  $k$  weeks relative to the week in which the individual got infected with the omicron virus.  $\theta_w$  are event-specific fixed effects for calendar week  $w$ ,  $\theta_i$  denotes background characteristics for individual  $i$  including gender, age dummies, parental country background and the child's country background, as well as municipality fixed effects.  $\epsilon_{iw}$  is the standard error clustered at the municipality level. Our primary parameters of interests are the  $\alpha_k$  and  $\beta_k$  attached to the event time dummies. These will capture the changes in our outcome variable among the children infected with delta and omicron relative to the comparison group consisting of uninfected or non-tested children.

1  
2  
3 The coefficients for  $k < 0$  indicate the pre-trends prior to infection time, while  $k > 0$  describe  
4 how the outcome changes after getting infected with either delta or omicron virus. Hence, the  
5 event-study allows for testing whether infected children followed the same patterns for GP  
6 visits as the noninfected.<sup>4</sup> The reference category was 1 week prior to infection and  
7 noninfected individuals were included as controls. ~~We also varied the time period to explore~~  
8 ~~the robustness of our findings.~~

9  
10  
11  
12  
13  
14  
15  
16  
17  
18  
19 ~~In total, 661,587 children, aged 0–10 years, were included in the study. After excluding~~  
20 ~~47,683 children with positive test during the study period that were not sequenced and 474~~  
21 ~~children who were vaccinated, the primary study population consisted of 613,448 children~~  
22 ~~comprising 4,907,584 person-weeks (Table). The delta variant was the dominant strain at the~~  
23 ~~beginning and omicron was the dominant strain at the end of the study period (Supplemental~~  
24 ~~Figure 1).~~

25  
26  
27  
28  
29  
30  
31  
32  
33  
34  
35  
36  
37  
38  
39  
40  
41  
42  
43  
44  
45  
46  
47  
48  
49  
50  
51  
52  
53  
54  
55  
56  
57  
58  
59  
60  
GP consultations in the weeks before infection were similar for the children with omicron and  
delta in the adjusted model (See the Figure and Supplemental Tables 2, 3 & 4). The aORs in  
the first and second week after positive tests were higher for delta than for omicron. Higher  
GP utilization was also found for children 4 and 5 weeks after testing positive for delta but  
returned to pre-infection levels in week 5 for omicron cases. Results from robustness control  
were similar (Supplemental Table 4).

Strengths of this study includes the use of data covering all Norwegian children and that both  
delta and omicron was circulating during our study period. A limitation of the study is that  
asymptomatic children may have been less likely to have had a test. If for example,

1  
2  
3 asymptomatic SARS-CoV-2 was more common for the omicron virus, we might have  
4  
5 underestimated the difference between the two strains.  
6

7  
8 In the Online Appendix we present robustness checks of our results by varying the time  
9  
10 period of our analysis.  
11

### 12 13 14 *Patient and public involvement*

15  
16 No patients were involved in setting the research question or the outcome measures, nor were  
17 they involved in developing plans for recruitment, design, or implementation of the study. No  
18 patients were asked to advise on interpretation or writing up of results. There are no plans to  
19 disseminate the results of the research to study participants or the relevant patient community.  
20  
21  
22  
23  
24  
25  
26  
27

### 28 **Funding**

29  
30  
31 ~~The study was internally funded by the Norwegian Institute of Public Health and externally~~  
32  
33 ~~by the Research Council of Norway (project no 262700).~~  
34  
35  
36  
37

### 38 **Acknowledgments**

39  
40 ~~The establishment of an emergency preparedness register forms part of the legally mandated~~  
41  
42 ~~responsibilities of the Norwegian Institute of Public Health during epidemics. The Ethics~~  
43  
44 ~~Committee of South-East Norway confirmed (4 June 2020, #153204) that external ethical~~  
45  
46 ~~board review was not required.~~  
47  
48  
49  
50  
51

### 52 **Results**

53  
54 In total, 661,587 children, aged 0–10 years, were residing in Norway in the study period.  
55  
56 After excluding 474 children who were vaccinated and 47,665 children with positive tests  
57  
58  
59  
60

1  
2  
3 during the study period where the virus variant was not identified as delta or omicron, the  
4 primary study population consisted of 613,448 children comprising 4,907,584 person-weeks.  
5  
6  
7  
8  
9

10 Figure 1 shows that delta was the dominant virus variant at the beginning of our study period,  
11 while omicron was the dominant variant at the end of our study period. Persons with omicron  
12 were older and more often born abroad than persons with delta, though the sex distribution  
13 was similar (Table 1).  
14  
15  
16  
17  
18  
19

20  
21 Table 2 shows descriptive statistics of the estimated sample, indicating that the fraction that  
22 visited the GP in the weeks before infection was similar for the children later infected with  
23 omicron and delta, and for those who either were not infected or not tested for SARS-CoV-2.  
24  
25  
26  
27  
28  
29

30  
31 The event study plot showing higher GP utilization following omicron, compared with delta  
32 (Figure 2). The aORs of 8.19 (std.err: 0.52) in the first and 7.10 (0.93) in the second week  
33 after delta were higher than comparable estimates for omicron of 6.67 (0.69) and 5.51 (0.72)  
34 in week one and two respectively. Higher GP utilization was also found for children 4 weeks  
35 after testing positive for both omicron and delta. Higher utilization was also found five weeks  
36 after testing positive for delta but returned to pre-infection levels in week 5 for omicron cases  
37 (see Table 3 for details). Results from robustness control were similar (Supplemental Table  
38 2).  
39  
40  
41  
42  
43  
44  
45  
46  
47  
48  
49  
50

## 51 **Discussion**

52  
53 In this study of 613,448 Norwegian children aged 0-10 years, we found increased GP  
54 utilization for children 1 and 2 weeks after testing positive for the omicron variant, with  
55 similar and more pronounced increases for children with the delta variant. Our findings  
56  
57  
58  
59  
60

1  
2  
3 suggest that omicron will place less pressure on the primary care services per case. However,  
4 given the higher transmissibility of the omicron than the delta variant it can still lead to a high  
5 burden on the health care system.<sup>6</sup>  
6  
7

8  
9  
10  
11  
12 We could find no study for comparison of our findings, i.e. to our knowledge, the present  
13 study is the first to shed light on healthcare use following the omicron vs delta variant in  
14 children.  
15  
16  
17

18  
19  
20  
21 A number of reports of the omicron variant in adults suggests less serious illness<sup>7</sup>, i.e. another  
22 possible interpretation of our findings may be that omicron is perceived as less severe,  
23 compared with the delta variant, lowering the parents' perceived need to seek healthcare after  
24 omicron than after delta. However, a key strength of our analysis is that both delta and  
25 omicron were circulating during our study period, and we adjusted for calendar week in our  
26 regression models. Hence, it is less likely that the results are driven by general changes in the  
27 inclination to contact the GP. In addition, it includes data covering all children residing in  
28 Norway, which reduce attrition and sample selection bias.  
29  
30  
31  
32  
33  
34  
35  
36  
37  
38  
39  
40  
41

42 Based on national recommendations in Norway, healthy children below age 12 are mostly  
43 unvaccinated.<sup>8</sup> PCR tests are freely available and a proportion of these are screened for  
44 variants of concern. Several of the most populous municipalities in Norway had implemented  
45 mass testing in the schools before the first case of omicron was detected in Norway in late  
46 November 2021. However, throughout the study period, it was the norm that all positive  
47 rapid antigen home tests had to be confirmed with a PCR-test. The increasing use of rapid  
48 antigen home tests is therefore unlikely to seriously bias our estimates.  
49  
50  
51  
52  
53  
54  
55  
56  
57  
58  
59  
60

1  
2  
3 A limitation of the study is that asymptomatic children might have been less likely to have a  
4 PCR-test. If, for example, asymptomatic SARS-CoV-2 infection was more common for the  
5 omicron than the delta variant, we might have underestimated the difference between them.  
6  
7 Also, our findings may not be generalizable to countries without equal and free access to  
8 healthcare and PCR testing for SARS-CoV-2 for all inhabitants. Finally, for continuous  
9 surveillance purposes, 25% of SARS-CoV-2 positive samples or up to 100 samples per week  
10 per local laboratory is sent to a reference laboratory for whole genome sequencing. When  
11 omicron emerged in Norway in late November 2021, the laboratories were requested to  
12 perform variant analyses locally on all positive samples. If this was not possible for capacity  
13 reasons, samples suspected to contain the omicron variant was prioritized for variant  
14 analyses. This might have led to variation in the tests that were sequenced over time.  
15  
16  
17  
18  
19  
20  
21  
22  
23  
24  
25  
26  
27  
28  
29  
30

### 31 **Conclusion**

32  
33 Our findings show that per positive test in children aged 0 to 10 years, the omicron variant is  
34 likely to result in less pressure on the health care system than the delta variant. However, the  
35 omicron variant is still associated with increased utilization, and it can still lead to a high  
36 burden on the health care system when the community omicron cases are high.  
37  
38  
39  
40  
41  
42  
43  
44  
45  
46  
47  
48  
49  
50  
51  
52

### 53 **References:**

- 54  
55 1. Lee B, Raszka WV, Jr., Dhochak N, Singhal T, Kabra S, et al. Pathophysiology of COVID-19  
56 in Children: Looking Forward, Not Back.: why children fare better than adults? *The*  
57 *Indian Journal of Pediatrics* 2021;147(1). DOI: 10.1542/peds.2020-029736;87(7):537-46.  
58  
59  
60



2. ~~————~~ Magnusson K, Skyrud KD, Suren P, et al. Healthcare use in 700 000 children and adolescents for six months after covid-19: before and after register based cohort study. *BMJ* 2022;376:e066809. doi: 10.1136/bmj-2021-066809
3. ~~————~~ Kozlov M. Does Omicron hit kids harder? Scientists are trying to find out-; Nature Web Site; 2022 [accessed 23.02. 2022].
3. ~~————~~ 4. Sigal A, Milo R, Jassat W. Estimating disease severity of Omicron and Delta SARS-CoV-2 infections. *Nature Reviews Immunology* 2022 doi: 10.1038/s41577-022-00720-5
5. ~~————~~ Bailey MJ, Goodman-Bacon A. The War on Poverty's Experiment in Public Medicine: Community Health Centers and the Mortality of Older Americans. *American Economic Review* 2015;105(3):1067-104. doi: 10.1257/aer.20120070
6. ~~————~~ Jørgensen SB, Nygård K, Kacelnik O, et al. Secondary Attack Rates for Omicron and Delta Variants of SARS-CoV-2 in Norwegian Households. *JAMA* 2022 doi: 10.1001/jama.2022.3780
7. ~~————~~ Veneti L, Bøås H, Kristoffersen AB, et al. Reduced risk of hospitalisation among reported COVID-19 cases infected with the SARS-CoV-2 Omicron BA. 1 variant compared with the Delta variant, Norway, December 2021 to January 2022. *Eurosurveillance* 2022;27(4):2200077.
8. ~~————~~ Coronavirus vaccine - information for the public-; The Norwegian Institute of Public Health (NIPH)-; 2022 [updated 28.02.2022-]. Available from: <https://www.fhi.no/en/id/vaccines/coronavirus-immunisation-programme/coronavirus-vaccine/#vaccination-of-children-and-adolescents>;-
4. ~~————~~ Dimick JB, Ryan AM. Methods for Evaluating Changes in Health Care Policy: The Difference-in-Differences Approach. *JAMA* 2014;312(22):2401-2402. DOI: 10.1001/jama.2014.16153 accessed 01.03. 2022.

**Table 1: Summary statistics of the estimation sample**

|                                   | Omicron   | Delta     | Rest              |
|-----------------------------------|-----------|-----------|-------------------|
| N                                 | 7,046     | 14,369    | 613,448,592,033   |
| Person-weeks                      | 56,368    | 114,952   | 4,907,584,736,264 |
| Age, mean (SD)                    | 6.1 (3.1) | 6.9 (2.8) | 5.21 (3.2)        |
| Born Foreign Country, (%)         | 7.2       | 6.3       | 5.5               |
| Parents foreign Born Country, (%) | 53.7      | 43.0      | 38.8              |
| Boys, (%)                         | 51.3      | 51.4      | 51.3              |

Notes: Standard deviation in brackets

**Figure****Table 2: Descriptive statistics of the estimated sample**

| Relative week | Delta                            |                  |                              | Omicron                          |                  |                           |
|---------------|----------------------------------|------------------|------------------------------|----------------------------------|------------------|---------------------------|
|               | Person-weeks with GP Appointment | Persons infected | Fraction with GP appointment | Person-weeks with GP appointment | Persons infected | Share with GP appointment |
| -5            | 19                               | 692              | 0.03                         | 145                              | 4,975            | 0.03                      |
| -4            | 55                               | 1,622            | 0.03                         | 176                              | 6,126            | 0.03                      |
| -3            | 113                              | 3,452            | 0.03                         | 147                              | 6,600            | 0.02                      |
| -2            | 187                              | 7,445            | 0.03                         | 120                              | 6,902            | 0.02                      |
| -1            | 259                              | 11,636           | 0.02                         | 125                              | 7,024            | 0.02                      |
| 0             | 2,285                            | 14,369           | 0.16                         | 846                              | 7,046            | 0.12                      |
| 1             | 1,795                            | 14,351           | 0.13                         | 674                              | 6,263            | 0.11                      |
| 2             | 335                              | 14,177           | 0.02                         | 136                              | 4,133            | 0.03                      |
| 3             | 282                              | 13,677           | 0.02                         | 60                               | 2,071            | 0.03                      |
| 4             | 304                              | 12,747           | 0.02                         | 17                               | 920              | 0.02                      |

**Table 3: Event study estimates of the effect of relative week according to week delta and omicron variant on GP use from the 29<sup>th</sup> of November 2021 until 23<sup>rd</sup> of January 2022.**

| Relative Week  | OR   | Std. Err. | P-value | Lower CI | Upper CI |
|----------------|------|-----------|---------|----------|----------|
| <b>Omicron</b> |      |           |         |          |          |
| Week -5        | 1.20 | 0.10      | 0.03    | 1.02     | 1.42     |
| Week -4        | 1.02 | 0.11      | 0.86    | 0.83     | 1.25     |
| Week -3        | 1.07 | 0.08      | 0.37    | 0.93     | 1.23     |
| Week -2        | 0.97 | 0.08      | 0.75    | 0.83     | 1.15     |
| Week -1        | 0.91 | 0.08      | 0.27    | 0.77     | 1.08     |
| Week 0         | 6.67 | 0.69      | 0.00    | 5.45     | 8.18     |
| Week 1         | 5.51 | 0.72      | 0.00    | 4.26     | 7.12     |
| Week 2         | 1.51 | 0.12      | 0.00    | 1.29     | 1.77     |
| Week 3         | 1.32 | 0.15      | 0.01    | 1.06     | 1.64     |
| Week 4         | 0.86 | 0.29      | 0.65    | 0.44     | 1.68     |
| <b>Delta</b>   |      |           |         |          |          |
| Week -5        | 0.58 | 0.37      | 0.39    | 0.16     | 2.04     |
| Week -4        | 0.97 | 0.24      | 0.90    | 0.60     | 1.57     |
| Week -3        | 1.18 | 0.18      | 0.27    | 0.88     | 1.60     |
| Week -2        | 1.20 | 0.11      | 0.04    | 1.01     | 1.44     |
| Week -1        | 0.96 | 0.07      | 0.63    | 0.83     | 1.12     |
| Week 0         | 8.19 | 0.52      | 0.00    | 7.24     | 9.27     |
| Week 1         | 7.10 | 0.93      | 0.00    | 5.50     | 9.17     |
| Week 2         | 1.39 | 0.08      | 0.00    | 1.24     | 1.56     |
| Week 3         | 1.26 | 0.08      | 0.00    | 1.11     | 1.42     |
| Week 4         | 1.34 | 0.08      | 0.00    | 1.19     | 1.50     |

Note: Regression results from the main specification using a Logit model. Number of person weeks = 4,907,584. We included controls for year of birth, calendar week, region of residence, country of birth, sex and parents' country of birth. Standard errors are clustered at the municipality level.

**Figure 1: The development of delta and omicron cases in the estimated sample, week 48, 2021 – week 3, 2022. Share of sequenced samples with confirmed delta, omicron, and other results.**  
[Figure1.pdf]

**Figure 2: Event-study analysis of pre- and post-SARS-COV-2 trends in odds ratios for GP utilization by variant**  
[FigureFigure2.pdf]

Note: Estimates from logistic regression analysis on weekly data are reported. Adjusted odds ratios were estimated for indicator variables for relative week to omicron and delta and the omitted category defined as one week prior to infection, i.e week -1. Odds ratios were adjusted for age by including age indicators for 1 year age groups, sex, indicator for birth country and parental birth country, and municipality of residence. Standard errors are clustered at municipality level.

1  
2  
3  
4  
5  
6  
7  
8  
9  
10  
11  
12  
13  
14  
15  
16  
17  
18  
19  
20  
21  
22  
23  
24  
25  
26  
27  
28  
29  
30  
31  
32  
33  
34  
35  
36  
37  
38  
39  
40  
41  
42  
43  
44  
45  
46  
47  
48  
49  
50  
51  
52  
53  
54  
55  
56  
57  
58  
59  
60

Confidential: For Review Only

# BMJ Paediatrics Open

## General practitioner visits after SARS-CoV-2 omicron compared to the delta variant in children in Norway: a prospective nationwide registry study

|                               |                                                                                                                                                                                                                                                                                                                                                                                                                                                         |
|-------------------------------|---------------------------------------------------------------------------------------------------------------------------------------------------------------------------------------------------------------------------------------------------------------------------------------------------------------------------------------------------------------------------------------------------------------------------------------------------------|
| Journal:                      | <i>BMJ Paediatrics Open</i>                                                                                                                                                                                                                                                                                                                                                                                                                             |
| Manuscript ID                 | bmjpo-2022-001502.R2                                                                                                                                                                                                                                                                                                                                                                                                                                    |
| Article Type:                 | Original research                                                                                                                                                                                                                                                                                                                                                                                                                                       |
| Date Submitted by the Author: | 05-Jul-2022                                                                                                                                                                                                                                                                                                                                                                                                                                             |
| Complete List of Authors:     | Arntzen, Sigurd Storehaug; Norwegian Institute of Public Health<br>Gjefsen, Hege Marie; Norwegian Institute of Public Health<br>Telle, Kjetil Elias; Norwegian Institute of Public Health<br>Magnusson, Karin; Norwegian Institute of Public Health<br>Stordal, Ketil; Norwegian Institute of Public Health<br>Håberg, Siri; Norwegian Institute of Public Health, Institute Management and Staff<br>Kinge, Jonas; Norwegian Institute of Public Health |
| Keywords:                     | COVID-19                                                                                                                                                                                                                                                                                                                                                                                                                                                |
|                               |                                                                                                                                                                                                                                                                                                                                                                                                                                                         |

SCHOLARONE™  
Manuscripts



I, the Submitting Author has the right to grant and does grant on behalf of all authors of the Work (as defined in the below author licence), an exclusive licence and/or a non-exclusive licence for contributions from authors who are: i) UK Crown employees; ii) where BMJ has agreed a CC-BY licence shall apply, and/or iii) in accordance with the terms applicable for US Federal Government officers or employees acting as part of their official duties; on a worldwide, perpetual, irrevocable, royalty-free basis to BMJ Publishing Group Ltd ("BMJ") its licensees and where the relevant Journal is co-owned by BMJ to the co-owners of the Journal, to publish the Work in this journal and any other BMJ products and to exploit all rights, as set out in our [licence](#).

The Submitting Author accepts and understands that any supply made under these terms is made by BMJ to the Submitting Author unless you are acting as an employee on behalf of your employer or a postgraduate student of an affiliated institution which is paying any applicable article publishing charge ("APC") for Open Access articles. Where the Submitting Author wishes to make the Work available on an Open Access basis (and intends to pay the relevant APC), the terms of reuse of such Open Access shall be governed by a Creative Commons licence – details of these licences and which [Creative Commons](#) licence will apply to this Work are set out in our licence referred to above.

Other than as permitted in any relevant BMJ Author's Self Archiving Policies, I confirm this Work has not been accepted for publication elsewhere, is not being considered for publication elsewhere and does not duplicate material already published. I confirm all authors consent to publication of this Work and authorise the granting of this licence.

1  
2  
3 **General practitioner visits after SARS-CoV-2 omicron compared to the delta variant in**  
4 **children in Norway: a prospective nationwide registry study**  
5  
6

7 Sigurd Storehaug Arntzen, MPhil<sup>1</sup>, Hege Marie Gjefsen, PhD<sup>1</sup>, Kjetil Elias Telle, PhD<sup>1</sup>,  
8 Karin Magnusson, PhD<sup>1</sup>, Ketil Størdal, MD PhD<sup>2</sup>, Siri Håberg, MD PhD<sup>3</sup>, Jonas Minet  
9 Kinge, PhD<sup>1,3,4</sup>  
10

11  
12 <sup>1</sup> Cluster for Health Services Research, Norwegian Institute of Public Health

13 <sup>2</sup> Division of Paediatric and Adolescent Medicine, University of Oslo

14 <sup>3</sup> Centre for Fertility and Health, Norwegian Institute of Public Health

15 <sup>4</sup> Department of Health Management and Health Economics, University of Oslo  
16  
17

18 **Address correspondence to:** Jonas Minet Kinge, Norwegian Institute of Public Health,  
19 Postboks 222, Skøyen, N-0213 Oslo  
20 E-mail: [jonas.minet.kinge@fhi.no](mailto:jonas.minet.kinge@fhi.no)  
21  
22

23  
24 **Conflict of Interest Disclosures (includes financial disclosures):** The authors have no  
25 example conflicts of interest to disclose.  
26  
27

28 **Funding/Support: Funding:** The study was internally funded by the Norwegian Institute of  
29 Public Health and externally by the Research Council of Norway (project no 262700). The  
30 funding sources had no influence over the design and conduct of the study; collection,  
31 management, analysis, and interpretation of the data; preparation, review, or approval of the  
32 manuscript; or decision to submit the manuscript for publication.  
33  
34  
35  
36  
37  
38  
39  
40  
41  
42  
43  
44  
45  
46  
47  
48  
49  
50  
51  
52  
53  
54  
55  
56  
57  
58  
59  
60

### **What is already known on this topic**

SARS-CoV-2 in children is known to lead to an immediate increase in primary care utilization for 1-2 weeks after a positive test, before quickly falling back to pre-infection utilization levels. The difference in primary care utilization following infection with the delta and omicron virus variants is unknown.

### **What this study adds**

A sudden increase in primary care use was observed in children who tested positive for SARS-CoV-2 in the two weeks after the test. After the first two weeks, the primary care utilization returned to pre-infection levels.

The increase in primary care utilization was higher for children infected with the delta than the omicron variant. Compared to the delta variant, the omicron variant is likely to result in less pressure on primary care services per infected child.



**Abstract:**

**Background:** SARS-CoV-2 infection in children is followed by an immediate increase in primary care utilization. The difference in utilization following infection with the delta and omicron virus variants is unknown.

**Objectives:** To study whether general practitioner (GP) contacts were different in children infected with the omicron vs delta variant, for up to four weeks after the week testing positive.

**Setting:** Primary care

**Participants:** All residents in Norway aged 0-10. After excluding 47,683 children with a positive test where the virus variant was not identified as delta or omicron and 474 children who were vaccinated, the primary study population consisted of 613,448 children.

**Main outcome measures:** GP visits

**Methods:** We estimated the difference in the weekly share visiting the GP after being infected with the delta or omicron variant to those in the study population who were either not tested or who tested negative, using an event-study design, controlling for calendar week of consultation, municipality fixed effects and sociodemographic factors in multivariate logistic regressions.

**Results:** Compared with pre-infection, increased GP utilization was found for children 1 and 2 weeks after testing positive for the omicron variant, with an odds ratio (OR) of 6.7 (Std.err: 0.69) in the first week and 5.5 (0.72) in the second. This increase was more pronounced for children with the delta variant, with an OR of 8.2 (0.52) in the first week and 7.1 (0.93) in the second. After 2 weeks, the GP utilization returned to pre-infection levels.

**Conclusion:** The omicron variant appears to have resulted in less primary health care interactions per infected child, compared with the delta variant.

## Introduction

SARS-CoV-2 for children is often referred to as leading to milder symptoms than in adults, and recent studies found no increase in specialist care in children following infection.<sup>1 2</sup>

However, SARS-CoV-2 infection in children is followed by an immediate increase in primary care utilization, and recent reports have discussed whether the omicron variant might cause more severe symptoms than the delta variant in children.<sup>2-4</sup>

Survey data can be used to determine patterns of health care need following infection, however, reporting and response bias may affect the accuracy of the estimates. Except for a few studies using registry data from a period dominated by delta and other earlier variants, little is known about the impact of SARS-CoV-2 on post-covid health care utilization in children<sup>2</sup>. Furthermore, we also do not know whether healthcare use among children and adolescents increases after initial omicron infection and whether this increase, if any, is comparable to the increase in utilization after infection with the delta variant. Such knowledge could be used to upscale or downscale the health care services.

Because the omicron variant has been found to cause less severe symptoms than the delta variant in adults, we hypothesized that a comparable pattern would be found for children. The aim of this analysis was to compare general practitioner (GP) contacts among children in the four weeks after being infected with the omicron or delta variants.

## Methods

Data used for this project was from the Emergency Preparedness Register (Beredt C19). The establishment of an emergency preparedness register forms part of the legally mandated responsibilities of the Norwegian Institute of Public Health during epidemics. The Ethics

1  
2  
3 Committee of South-East Norway confirmed (4 June 2020, #153204) that external ethical  
4  
5 board review was not required.  
6  
7  
8  
9

### 10 *Data Sources*

11  
12 To estimate the share of children aged 0-10 years old visiting the GP after being infected with  
13  
14 delta or omicron variant we used population wide longitudinal registry data from Norway.  
15  
16 BeredtC19 is an emergency preparedness register that aims to rapidly provide ongoing  
17  
18 overview and knowledge of the prevalence, causal relationships, and consequences of the  
19  
20 COVID-19 epidemic in Norway. It includes information from various data sources that are  
21  
22 updated daily, including the Norwegian surveillance system for communicable diseases (all  
23  
24 testing and screening for SARS-CoV-2), the National Population Register (age, sex, country  
25  
26 of birth, the National Immunization Register (vaccination status), and the Norway Control  
27  
28 and Payment of Health Reimbursement (all physical and electronic consultations with all  
29  
30 general practitioners). A more in-depth summary of the data sources used for our analysis is  
31  
32 available in the Appendix Supplementary Table 1.  
33  
34  
35  
36  
37  
38  
39

### 40 *Study Population*

41  
42 We followed all Norwegian residents aged 0-10 years from the 29<sup>th</sup> of November 2021 until  
43  
44 23<sup>rd</sup> of January 2022. Figure 1 shows the share of the sequenced PCR tests that were delta or  
45  
46 omicron variant from the 29<sup>th</sup> of November until the 23<sup>rd</sup> of January. Children who tested  
47  
48 positive but whose tests were not sequenced, and children who had been vaccinated, were  
49  
50 excluded from the analysis. The upper age cut-off at 10 was set as children who turned 11 at  
51  
52 the start of the period, turned 12 during the study period and thus become eligible for the  
53  
54 vaccine.  
55  
56  
57  
58  
59  
60

1  
2  
3 The categorical outcome variable for GP contact was set to 1 if the individual had at least one  
4 physical- or e-consultation with a GP in a week, and 0 otherwise. In Norway, consultations  
5 with the GP are free for children aged below 16. The GPs serve as the first line in the health  
6 care services, prescribing medicines and performing simple procedures, and referring patients  
7 to further care when necessary.  
8  
9  
10  
11  
12  
13  
14  
15  
16

### 17 *Statistical design*

18  
19 We constructed a data set including one observation per individual per week from week 48 of  
20 2021 until the 3rd week of 2022. Each week, each individual could either be registered with  
21 a GP consultation or not. For the individuals that were infected with covid-19, we constructed  
22 an index week of infection. For each index week, persons with omicron or delta were  
23 compared to persons without omicron or delta. Event time was indicated relative to the index  
24 week of covid-19 infection for each person and was our main variable of interest explaining  
25 primary health care use for omicron and delta variant, respectively.  
26  
27  
28  
29  
30  
31  
32  
33  
34  
35  
36  
37

38 Multivariate logistic regression was used to estimate adjusted odds ratios (aOR) with 95%  
39 confidence intervals (CI) for GP consultations. Exploiting the longitudinal nature of the data,  
40 we used an event-study design<sup>5 6</sup>, controlling for calendar week of consultation, municipality  
41 fixed effects and sociodemographic characteristics.  
42  
43  
44  
45  
46  
47  
48

49 The event-study is especially well suited when the timing of events varies across groups in  
50 the population, there is a high number of units not experiencing an event and any measured  
51 association might vary over time<sup>7</sup>. The approach is widely used in social sciences and now  
52 also increasingly popular in epidemiology and public health as it can display an abnormal  
53 shift in trend, and attribute that shift to an event<sup>8-12</sup>.  
54  
55  
56  
57  
58  
59  
60

The temporal aORs of being infected by omicron and delta were estimated from 5 weeks before to 4 weeks after the week 0 of infection. We regress weeks to and from confirmed positive test on binary GP visits using the following expression:

$$\sigma(y_{iw}) = 1/(1 + e^{-y_{iw}})$$

$$y_{iw} = \theta_w + \theta_i + \sum_{k=-5, k \neq -1}^{k=5} \delta_{k(iw)} \alpha_k + \sum_{k=-5, k \neq -1}^{k=5} \sigma_{k(iw)} \beta_k$$

$y_{iw}$  is the outcome for individual  $i$  in week  $w$ , i.e., GP visits.  $\theta_w$  is a set of dummy variables for calendar week accounting for any changes in the inclination to visit a GP due to e.g., capacity constraints or holidays.  $\theta_i$  denotes background characteristics for individual  $i$  including gender, age dummies, parental country background and the child's country background, as well as municipality fixed effects.  $\delta_k$  is a set of time dummy variables, indicating the event time, i.e., the number of weeks  $k$  relative to the week in which the individual got infected with the delta virus, taking the value 0 if not being infected with the delta virus. Similarly,  $\sigma_k$  is a set of dummy variables for event time in the case of infection with the omicron variant. The week prior to the infection,  $k = -1$ , is used as our reference value, and this value is therefore omitted from the regression. Our primary parameters of interests were the  $\beta_k$  and  $\alpha_k$  attached to the event time dummies. These captured the changes in the probability of visiting the GP among the children infected with delta and omicron relative to the comparison group consisting of uninfected or non-tested.  $\epsilon_{iw}$  was the standard error clustered at the municipality level.

1  
2  
3 The coefficients  $\delta_k$  and  $\sigma_k$  for  $k < 0$  indicated the GP use develops prior to infection time,  
4 while  $k > 0$  described how the outcome changed after getting infected with either delta or  
5 omicron virus. Hence, the event-study framework allows for testing whether infected children  
6 followed the same patterns for GP visits as the noninfected prior to infection, and whether  
7 this pattern changed after the week 0 of infection. A discontinuous jump in the probability of  
8 visiting the GP around week 0 indicates an estimated difference in the probability of visiting  
9 the GP between the individuals infected with omicron or delta, and our comparison groups  
10 consisting of noninfected individuals.  
11  
12  
13  
14  
15  
16  
17  
18  
19  
20  
21  
22  
23

24 In the Online Appendix we present robustness checks of our results by varying the time  
25 period of our analysis, age stratified analysis and results of analysis with additional  
26 adjustment for municipality-specific time trends.  
27  
28  
29  
30  
31  
32

### 33 *Patient and public involvement*

34 No patients were involved in setting the research question or the outcome measures, nor were  
35 they involved in developing plans for recruitment, design, or implementation of the study. No  
36 patients were asked to advise on interpretation or writing up of results. There are no plans to  
37 disseminate the results of the research to study participants or the relevant patient community.  
38  
39  
40  
41  
42  
43  
44  
45  
46

### 47 **Results**

48 In total, 661,587 children, aged 0–10 years, were residing in Norway in the study period.  
49 After excluding 474 children who were vaccinated and 47,665 children with positive tests  
50 during the study period where the virus variant was not identified as delta or omicron, the  
51 primary study population consisted of 613,448 children comprising 4,907,584 person-weeks.  
52  
53  
54  
55  
56  
57  
58  
59  
60

1  
2  
3 Figure 1 shows that delta was the dominant virus variant at the beginning of our study period,  
4 while omicron was the dominant variant at the end of our study period. Persons with omicron  
5 were older and more often born abroad than persons with delta, though the sex distribution  
6 was similar (Table 1).  
7  
8  
9  
10  
11  
12  
13  
14

15 Table 2 shows descriptive statistics of the estimated sample, indicating that the fraction that  
16 visited the GP in the weeks before infection was similar for the children later infected with  
17 omicron and delta, and for those who either were not infected or not tested for SARS-CoV-2.  
18  
19  
20  
21  
22  
23

24 The event study plot shows higher GP utilization following omicron, compared with delta  
25 (Figure 2). The aORs of 8.19 (std.err: 0.52) in the first and 7.10 (0.93) in the second week  
26 after delta were higher than comparable estimates for omicron of 6.67 (0.69) and 5.51 (0.72)  
27 in week one and two respectively. Higher GP utilization was also found for children 4 weeks  
28 after testing positive for both omicron and delta. Higher utilization was also found four weeks  
29 after testing positive for delta but returned to pre-infection levels in week 4 for omicron cases  
30 (see Table 3 for details).  
31  
32  
33  
34  
35  
36  
37  
38  
39  
40  
41

42 Results from when varying included time-period were similar (Supplemental Table 2). The  
43 results were also replicated in each age strata (Supplemental Tables 3A-C). The results were  
44 also robust to analysis including municipality-specific time trends (Supplemental Table 4).  
45  
46  
47  
48  
49  
50

## 51 Discussion

52 In this study of 613,448 Norwegian children aged 0-10 years, we found increased GP  
53 utilization for children 1 and 2 weeks after testing positive for the omicron variant, with  
54  
55  
56  
57  
58  
59  
60

1  
2  
3 similar and more pronounced increases for children with the delta variant. Our findings  
4 suggest that omicron will place less pressure on the primary care services per case.  
5  
6  
7  
8  
9

10 In the week following positive test 16% of children with delta visited the GP, compared with  
11 12% with omicron. After one week, this percent dropped to 13 and 11 percent for children  
12 with delta and omicron, respectively. This suggest less pressure on the services from  
13 omicron. However, if caseload is substantially increased, it might outweigh the reduced  
14 pressure per case. The overall pressure on the health care system is a product of how many  
15 are infected and their inclination to use the health care system. Even if the inclination is  
16 overall lower with omicron, the pressure on the health care system can be higher if the  
17 number of infected is sufficiently high.  
18  
19  
20  
21  
22  
23  
24  
25  
26  
27  
28  
29

30 A number of reports of the omicron variant in adults suggested less serious illness already a  
31 few weeks after the initial reports of the new variant<sup>13</sup>. Thus, our findings may be affected by  
32 parents' perceived less need to seek healthcare after omicron in their children, than after  
33 delta. However, a key strength of our analysis was that both delta and omicron were  
34 circulating during our study period, and the parents were not informed which strain they were  
35 infected with. Hence, given that we adjust for overall time trend, it is unlikely that a  
36 difference in the perceived relative severity of the two strains was the main driver of our  
37 results. One exception is that if infection with the delta and omicron variant differed in  
38 symptoms, known to the parents, the parents could have reacted accordingly.  
39  
40  
41  
42  
43  
44  
45  
46  
47  
48  
49  
50  
51  
52  
53

54 There might very well have been fluctuations in the inclination for GP visits over time. We  
55 adjusted for calendar week in our regression models, making it unlikely that the results were  
56 driven by general changes in the inclination to contact the GP. As both virus strains were  
57  
58  
59  
60



1  
2  
3 present in all weeks included in our analysis, changes due to e.g. high pressure on GPs or an  
4  
5 overall impression of omicron being less severe should be addressed by the week-fixed  
6  
7 effects. In addition, our analysis included data covering all children residing in Norway,  
8  
9 which reduced attrition and sample selection bias.  
10  
11

12  
13  
14 Based on national recommendations in Norway, healthy children below age 12 are mostly  
15  
16 unvaccinated.<sup>14</sup> PCR tests are freely available and a proportion of these are screened for  
17  
18 variants of concern. Several of the most populous municipalities in Norway had implemented  
19  
20 mass testing in the schools before the first case of omicron was detected in Norway in late  
21  
22 November 2021. However, throughout the study period, it was the norm that all positive  
23  
24 rapid antigen home tests had to be confirmed with a PCR-test. The increasing use of rapid  
25  
26 antigen home tests was therefore unlikely to seriously bias our estimates.  
27  
28  
29

30  
31  
32 A limitation of the study was that asymptomatic children might have been less likely to have  
33  
34 a PCR-test. If, for example, asymptomatic SARS-CoV-2 infection was more common for the  
35  
36 omicron than the delta variant, we might have underestimated the difference between them.  
37  
38 Also, our findings may not be generalizable to countries without equal and free access to  
39  
40 healthcare and PCR testing for SARS-CoV-2 for all inhabitants. Finally, there have been  
41  
42 variation in the tests that were sequenced over time. For capacity reasons, samples suspected  
43  
44 to contain the omicron variant were prioritized for variant analyses for a part of the period.  
45  
46 This might have led to variation in the tests that were sequenced over time and therefore  
47  
48 potentially the composition of the groups.  
49  
50  
51  
52  
53

## 54 55 56 **Conclusion** 57 58 59 60

1  
2  
3 Our findings showed that per positive test in children aged 0 to 10 years, the omicron variant  
4 was likely to result in fewer consultations per positive tested children, than the delta variant.  
5  
6 However, the omicron variant was still associated with higher total number of consultations,  
7  
8 and could lead to a high burden on the health care system when the number of children  
9  
10 infected with omicron are high  
11  
12  
13  
14  
15  
16  
17  
18  
19  
20  
21  
22  
23

## 24 **References:**

- 25 1. Dhochak N, Singhal T, Kabra S, et al. Pathophysiology of COVID-19: why children fare better than  
26 adults? *The Indian Journal of Pediatrics* 2020;87(7):537-46.
- 27 2. Magnusson K, Skyrud KD, Suren P, et al. Healthcare use in 700 000 children and adolescents for six  
28 months after covid-19: before and after register based cohort study. *BMJ*  
29 2022;376:e066809. doi: 10.1136/bmj-2021-066809
- 30 3. Kozlov M. Does Omicron hit kids harder? Scientists are trying to find out: Nature Web Site; 2022  
31 [accessed 23.02. 2022].
- 32 4. Sigal A, Milo R, Jassat W. Estimating disease severity of Omicron and Delta SARS-CoV-2 infections.  
33 *Nature Reviews Immunology* 2022 doi: 10.1038/s41577-022-00720-5
- 34 5. Sun L, Abraham S. Estimating dynamic treatment effects in event studies with heterogeneous  
35 treatment effects. *Journal of Econometrics* 2021;225(2):175-99. doi:  
36 <https://doi.org/10.1016/j.jeconom.2020.09.006>
- 37 6. Dimick JB, Ryan AM. Methods for Evaluating Changes in Health Care Policy: The Difference-in-  
38 Differences Approach. *JAMA* 2014;312(22):2401-02. doi: 10.1001/jama.2014.16153
- 39 7. Goodman-Bacon A. Difference-in-differences with variation in treatment timing. *Journal of*  
40 *Econometrics* 2021;225(2):254-77.
- 41 8. Ly DP, Essien UR, Olenski AR, et al. Affirmative action bans and enrollment of students from  
42 underrepresented racial and ethnic groups in US public medical schools. *Annals of Internal*  
43 *Medicine* 2022
- 44 9. Auger N, Naimi AI, Smargiassi A, et al. Extreme heat and risk of early delivery among preterm and  
45 term pregnancies. *Epidemiology* 2014:344-50.
- 46 10. Abouk R, Pacula RL, Powell D. Association between state laws facilitating pharmacy distribution  
47 of naloxone and risk of fatal overdose. *JAMA internal medicine* 2019;179(6):805-11.
- 48 11. Schnake-Mahl AS, O'Leary G, Mullachery PH, et al. The impact of keeping indoor dining closed on  
49 COVID-19 rates among large US cities: a quasi-experimental design. *Epidemiology*  
50 2021;33(2):200-08.
- 51 12. Ghosh AK, Venkatraman S, Soroka O, et al. THE EFFECT OF SOCIAL DISTANCING MEASURES ON  
52 COVID-19 RELATED HOSPITALIZATION IN NEW YORK: AN EVENT STUDY EXAMINING THE  
53 ROLE OF OVERCROWDED HOUSING. *Journal of General Internal Medicine* 2021:S77-S77.
- 54  
55  
56  
57  
58  
59  
60

13. Veneti L, Bøås H, Kristoffersen AB, et al. Reduced risk of hospitalisation among reported COVID-19 cases infected with the SARS-CoV-2 Omicron BA. 1 variant compared with the Delta variant, Norway, December 2021 to January 2022. *Eurosurveillance* 2022;27(4):2200077.
14. Coronavirus vaccine - information for the public: The Norwegian Institute of Public Health (NIPH); 2022 [updated 28.02.2022. Available from: <https://www.fhi.no/en/id/vaccines/coronavirus-immunisation-programme/coronavirus-vaccine/#vaccination-of-children-and-adolescents> accessed 01.03. 2022.

**Table 1: Summary statistics of the estimation sample**

|                                   | Omicron   | Delta     | Rest      |
|-----------------------------------|-----------|-----------|-----------|
| N                                 | 7,046     | 14,369    | 592,033   |
| Person-weeks                      | 56,368    | 114,952   | 4,736,264 |
| Age, mean (SD)                    | 6.1 (3.1) | 6.9 (2.8) | 5.1 (3.2) |
| Born Foreign Country, (%)         | 7.2       | 6.3       | 5.5       |
| Parents foreign Born Country, (%) | 53.7      | 43.0      | 38.8      |
| Boys, (%)                         | 51.3      | 51.4      | 51.3      |

Notes: Standard deviation in brackets

**Table 2: Descriptive statistics of the estimated sample**

| Relative week | Omicron                          |                  |                           | Delta                            |                  |                              |
|---------------|----------------------------------|------------------|---------------------------|----------------------------------|------------------|------------------------------|
|               | Person-weeks with GP appointment | Persons infected | Share with GP appointment | Person-weeks with GP Appointment | Persons infected | Fraction with GP appointment |
| -5            | 145                              | 4,975            | 0.03                      | 19                               | 692              | 0.03                         |
| -4            | 176                              | 6,126            | 0.03                      | 55                               | 1,622            | 0.03                         |
| -3            | 147                              | 6,600            | 0.02                      | 113                              | 3,452            | 0.03                         |
| -2            | 120                              | 6,902            | 0.02                      | 187                              | 7,445            | 0.03                         |
| -1            | 125                              | 7,024            | 0.02                      | 259                              | 11,636           | 0.02                         |
| 0             | 846                              | 7,046            | 0.12                      | 2,285                            | 14,369           | 0.16                         |
| 1             | 674                              | 6,263            | 0.11                      | 1,795                            | 14,351           | 0.13                         |
| 2             | 136                              | 4,133            | 0.03                      | 335                              | 14,177           | 0.02                         |
| 3             | 60                               | 2,071            | 0.03                      | 282                              | 13,677           | 0.02                         |
| 4             | 17                               | 920              | 0.02                      | 304                              | 12,747           | 0.02                         |

Table 3: Event study estimates of the effect of relative week according to week delta and omicron variant on GP use from the 29<sup>th</sup> of November 2021 until 23<sup>rd</sup> of January 2022.

| Relative Week                                                                                                                                                                                                                                                                                                                                                                                                                            | OR   | Std. Err. | P-value | Lower CI | Upper CI | Test for equal OR (P-value)* |
|------------------------------------------------------------------------------------------------------------------------------------------------------------------------------------------------------------------------------------------------------------------------------------------------------------------------------------------------------------------------------------------------------------------------------------------|------|-----------|---------|----------|----------|------------------------------|
| <b>Omicron</b>                                                                                                                                                                                                                                                                                                                                                                                                                           |      |           |         |          |          |                              |
| Week -5                                                                                                                                                                                                                                                                                                                                                                                                                                  | 1.02 | 0.11      | 0.86    | 0.83     | 1.25     | 0.85                         |
| Week -4                                                                                                                                                                                                                                                                                                                                                                                                                                  | 1.07 | 0.08      | 0.37    | 0.93     | 1.23     | 0.53                         |
| Week -3                                                                                                                                                                                                                                                                                                                                                                                                                                  | 0.97 | 0.08      | 0.75    | 0.83     | 1.15     | 0.13                         |
| Week -2                                                                                                                                                                                                                                                                                                                                                                                                                                  | 0.91 | 0.08      | 0.27    | 0.77     | 1.08     | 0.62                         |
| Week -1                                                                                                                                                                                                                                                                                                                                                                                                                                  | 1    |           |         |          |          |                              |
| Week 0                                                                                                                                                                                                                                                                                                                                                                                                                                   | 6.67 | 0.69      | 0.00    | 5.45     | 8.18     | 0.01                         |
| Week 1                                                                                                                                                                                                                                                                                                                                                                                                                                   | 5.51 | 0.72      | 0.00    | 4.26     | 7.12     | <0.01                        |
| Week 2                                                                                                                                                                                                                                                                                                                                                                                                                                   | 1.51 | 0.12      | 0.00    | 1.29     | 1.77     | 0.46                         |
| Week 3                                                                                                                                                                                                                                                                                                                                                                                                                                   | 1.32 | 0.15      | 0.01    | 1.06     | 1.64     | 0.70                         |
| Week 4                                                                                                                                                                                                                                                                                                                                                                                                                                   | 0.86 | 0.29      | 0.65    | 0.44     | 1.68     | 0.18                         |
| <b>Delta</b>                                                                                                                                                                                                                                                                                                                                                                                                                             |      |           |         |          |          |                              |
| Week -5                                                                                                                                                                                                                                                                                                                                                                                                                                  | 0.97 | 0.24      | 0.90    | 0.60     | 1.57     |                              |
| Week -4                                                                                                                                                                                                                                                                                                                                                                                                                                  | 1.18 | 0.18      | 0.27    | 0.88     | 1.60     |                              |
| Week -3                                                                                                                                                                                                                                                                                                                                                                                                                                  | 1.20 | 0.11      | 0.04    | 1.01     | 1.44     |                              |
| Week -2                                                                                                                                                                                                                                                                                                                                                                                                                                  | 0.96 | 0.07      | 0.63    | 0.83     | 1.12     |                              |
| Week -1                                                                                                                                                                                                                                                                                                                                                                                                                                  | 1    |           |         |          | 1        |                              |
| Week 0                                                                                                                                                                                                                                                                                                                                                                                                                                   | 8.19 | 0.52      | 0.00    | 7.24     | 9.27     |                              |
| Week 1                                                                                                                                                                                                                                                                                                                                                                                                                                   | 7.10 | 0.93      | 0.00    | 5.50     | 9.17     |                              |
| Week 2                                                                                                                                                                                                                                                                                                                                                                                                                                   | 1.39 | 0.08      | 0.00    | 1.24     | 1.56     |                              |
| Week 3                                                                                                                                                                                                                                                                                                                                                                                                                                   | 1.26 | 0.08      | 0.00    | 1.11     | 1.42     |                              |
| Week 4                                                                                                                                                                                                                                                                                                                                                                                                                                   | 1.34 | 0.08      | 0.00    | 1.19     | 1.50     |                              |
| <p>Note: Regression results from the main specification using a Logit model. Number of person weeks = 4,906,952. We included controls for year of birth, calendar week, region of residence, country of birth, sex and parents' country of birth. Standard errors were clustered at the municipality level.</p> <p>* the column shows p-values from Wald-tests of equal OR for omicron versus delta, based on the regression output.</p> |      |           |         |          |          |                              |

1  
2  
3 **Figure 1: The development of delta and omicron cases in the estimated sample, week 48, 2021 –**  
4 **week 3, 2022. Share of sequenced samples with confirmed delta, omicron, and other results.**  
5  
6 [Figure1.pdf]  
7  
8

9 **Figure 2: Event-study analysis of pre- and post-SARS-COV-2 trends in odds ratios for GP**  
10 **utilization by variant**  
11 [Figure2.pdf]  
12

13 Note: Estimates from logistic regression analysis on weekly data are reported. Adjusted odds ratios  
14 were estimated for indicator variables for relative week to omicron and delta and the omitted category  
15 defined as one week prior to infection, i.e week -1. Odds ratios were adjusted for age by including age  
16 indicators for 1 year age groups, sex, indicator for birth country and parental birth country, and  
17 municipality of residence. Standard errors were clustered at municipality level.  
18  
19  
20  
21  
22  
23  
24  
25  
26  
27  
28  
29  
30  
31  
32  
33  
34  
35  
36  
37  
38  
39  
40  
41  
42  
43  
44  
45  
46  
47  
48  
49  
50  
51  
52  
53  
54  
55  
56  
57  
58  
59  
60

Variant Share of the Sequenced Tests

22  
23  
24  
25  
26  
27  
28  
29  
30  
31

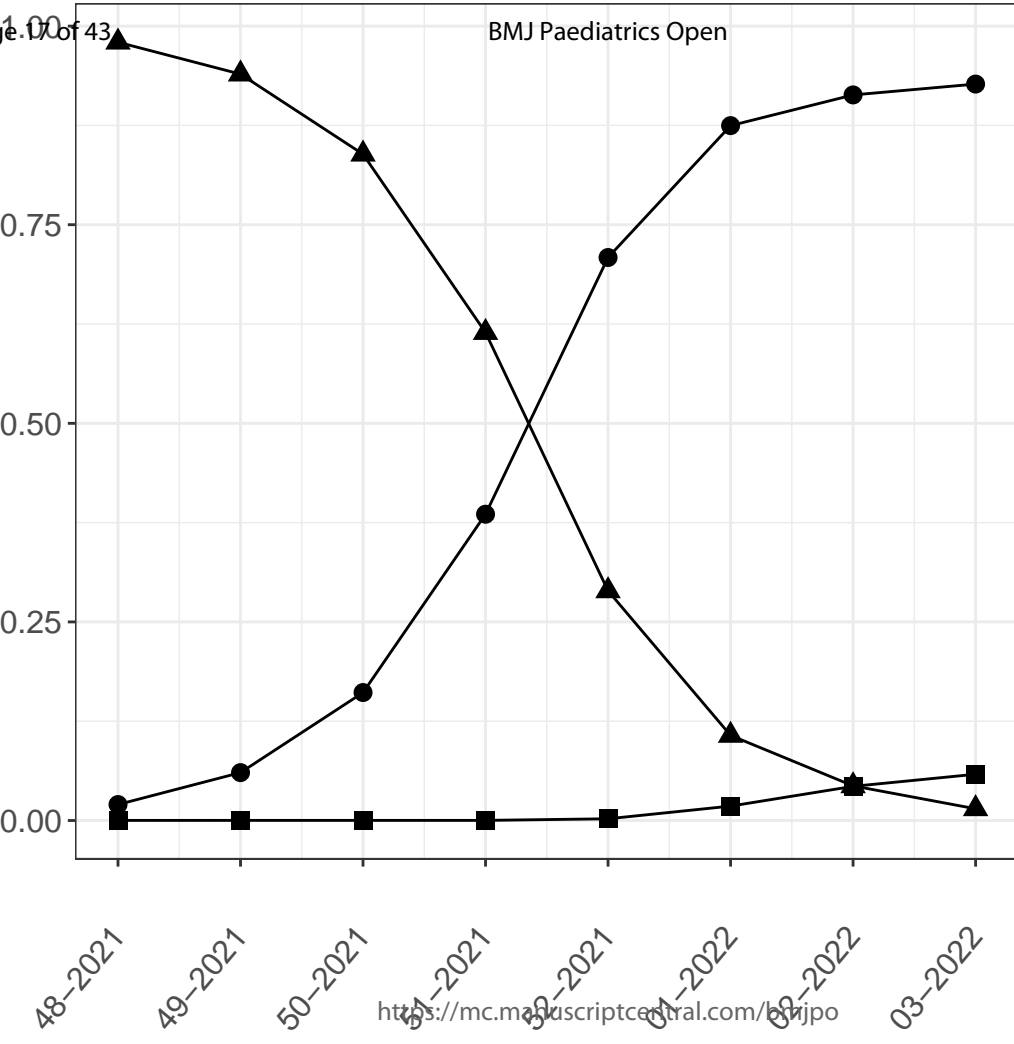

Variant

- Omicron
- ▲ Delta
- Other

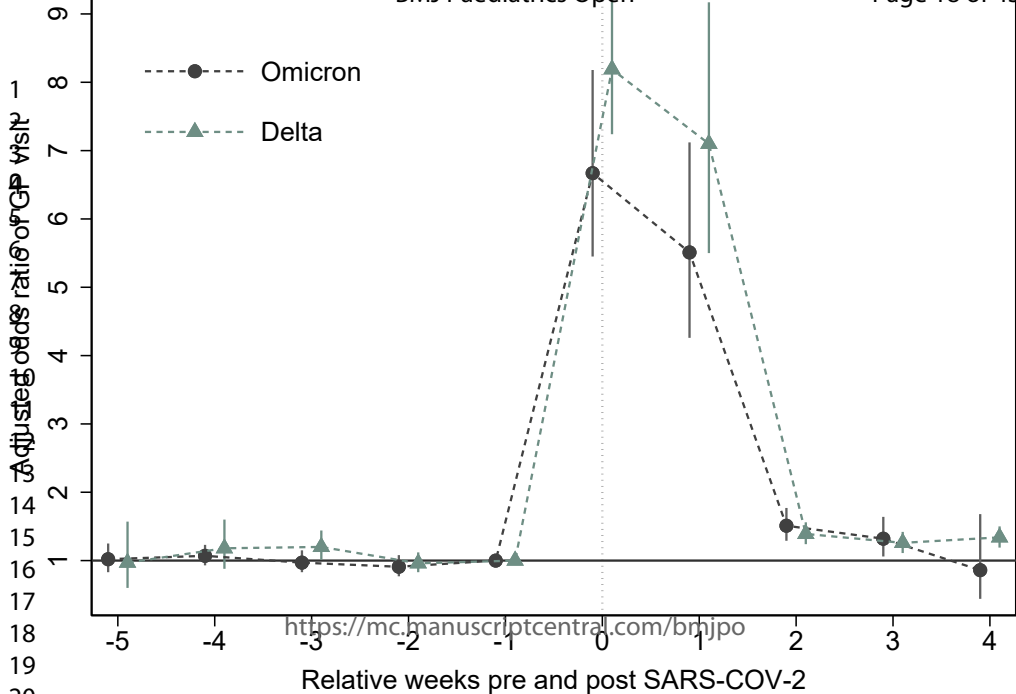

1  
2  
3  
4  
5  
6  
7  
8  
9  
10  
11  
12  
13  
14  
15  
16  
17  
18  
19  
20  
21  
22  
23  
24  
25  
26  
27  
28  
29  
30  
31  
32  
33  
34  
35  
36  
37  
38  
39  
40  
41  
42  
43  
44  
45  
46  
47  
48  
49  
50  
51  
52  
53  
54  
55  
56  
57  
58  
59  
60

**Supplementary online content**

*Arntzen et al. General practitioner visits after SARS-CoV-2 omicron compared to the delta variant in children in Norway: a prospective nationwide registry study*

Confidential: For Review Only



## Supplemental Methods

### Part 1: Data sources

In this study, we utilized the Norwegian preparedness registry (Beredt C19) to retrieve and link nation-wide individual-level data originating from the sources listed in Supplementary Table 3.

Table 1. Data sources in Beredt C19 used in this study and information obtained from each source.

| Name of data source                                         | Information obtained                                                                                                                                                                                                                                                                                                                                                                                                                                                                                                                                                                                                                                                                                                                       |
|-------------------------------------------------------------|--------------------------------------------------------------------------------------------------------------------------------------------------------------------------------------------------------------------------------------------------------------------------------------------------------------------------------------------------------------------------------------------------------------------------------------------------------------------------------------------------------------------------------------------------------------------------------------------------------------------------------------------------------------------------------------------------------------------------------------------|
| The National Population Register                            | Resident of Norway November 1 <sup>st</sup> 2021<br>Age<br>Sex<br>Municipality of residence<br>Country of birth<br>Parents' country of birth                                                                                                                                                                                                                                                                                                                                                                                                                                                                                                                                                                                               |
| The Norway Control and Payment of Health Reimbursement      | All physical and electronic consultations with all general practitioners<br>Date of consultation                                                                                                                                                                                                                                                                                                                                                                                                                                                                                                                                                                                                                                           |
| The Norwegian Surveillance System for Communicable Diseases | Date of sample of SARS-CoV-2 positive test<br>Classification of SARS-CoV-2 variants by targeted commercial or in-house PCR analyses for variant detection, Sanger sequencing of selected parts of the viral genome or whole genome sequencing.<br><br>For continuous surveillance purposes, 25% of SARS-CoV-2 positive samples or up to 100 samples per week per local laboratory is sent to a reference laboratory for whole genome sequencing. When Omicron emerged in Norway in late November 2021, the laboratories were requested to perform variant analyses locally on all positive samples. If this was not possible for capacity reasons, samples suspected to contain the Omicron variant were prioritized for variant analyses. |
| The National Immunization Register                          | Vaccination status by January 23rd, 2022<br><br>There is yet no recommended general vaccination for children below 12 years of age.                                                                                                                                                                                                                                                                                                                                                                                                                                                                                                                                                                                                        |

1  
2  
3  
4  
5  
6  
7  
8  
9  
10  
11  
12  
13  
14  
15  
16  
17  
18  
19  
20  
21  
22  
23  
24  
25  
26  
27  
28  
29  
30  
31  
32  
33  
34  
35  
36  
37  
38  
39  
40  
41  
42  
43  
44  
45  
46  
47  
48  
49  
50  
51  
52  
53  
54  
55  
56  
57  
58  
59  
60

---

Information was linked at the individual level using the unique personal identification number (encrypted version) provided to every Norwegian resident at birth or upon immigration.

---

Confidential: For Review Only

Supplemental Table 2: Event study estimates from the sensitivity analysis of the effect of relative week according to week Delta and Omicron variant on GP use from the 15<sup>th</sup> of November 2021 until 6<sup>th</sup> of February 2022.

| Relative Week                                                                                                                                                                                                                                                                                             | OR   | Std. Err. | P-value | Lower CI | Upper CI |
|-----------------------------------------------------------------------------------------------------------------------------------------------------------------------------------------------------------------------------------------------------------------------------------------------------------|------|-----------|---------|----------|----------|
| <b>Omicron</b>                                                                                                                                                                                                                                                                                            |      |           |         |          |          |
| Week -5                                                                                                                                                                                                                                                                                                   | 1.01 | 0.11      | 0.90    | 0.82     | 1.26     |
| Week -4                                                                                                                                                                                                                                                                                                   | 1.10 | 0.08      | 0.23    | 0.94     | 1.28     |
| Week -3                                                                                                                                                                                                                                                                                                   | 0.95 | 0.08      | 0.54    | 0.81     | 1.12     |
| Week -2                                                                                                                                                                                                                                                                                                   | 0.95 | 0.07      | 0.48    | 0.81     | 1.10     |
| Week -1                                                                                                                                                                                                                                                                                                   | 1    |           |         | 1        | 1        |
| Week 0                                                                                                                                                                                                                                                                                                    | 6.37 | 0.62      | 0.00    | 5.26     | 7.71     |
| Week 1                                                                                                                                                                                                                                                                                                    | 5.18 | 0.77      | 0.00    | 3.86     | 6.94     |
| Week 2                                                                                                                                                                                                                                                                                                    | 1.42 | 0.10      | 0.00    | 1.24     | 1.62     |
| Week 3                                                                                                                                                                                                                                                                                                    | 1.47 | 0.11      | 0.00    | 1.27     | 1.70     |
| Week 4                                                                                                                                                                                                                                                                                                    | 1.32 | 0.13      | 0.01    | 1.08     | 1.60     |
| <b>Delta</b>                                                                                                                                                                                                                                                                                              |      |           |         |          |          |
| Week -5                                                                                                                                                                                                                                                                                                   | 0.93 | 0.09      | 0.45    | 0.77     | 1.12     |
| Week -4                                                                                                                                                                                                                                                                                                   | 1.02 | 0.08      | 0.79    | 0.88     | 1.18     |
| Week -3                                                                                                                                                                                                                                                                                                   | 1.00 | 0.06      | 0.98    | 0.90     | 1.12     |
| Week -2                                                                                                                                                                                                                                                                                                   | 0.92 | 0.05      | 0.11    | 0.84     | 1.02     |
| Week -1                                                                                                                                                                                                                                                                                                   | 1    |           |         | 1        | 1        |
| Week 0                                                                                                                                                                                                                                                                                                    | 8.19 | 0.54      | 0.00    | 7.20     | 9.32     |
| Week 1                                                                                                                                                                                                                                                                                                    | 7.26 | 0.93      | 0.00    | 5.64     | 9.34     |
| Week 2                                                                                                                                                                                                                                                                                                    | 1.35 | 0.08      | 0.00    | 1.20     | 1.52     |
| Week 3                                                                                                                                                                                                                                                                                                    | 1.27 | 0.07      | 0.00    | 1.15     | 1.41     |
| Week 4                                                                                                                                                                                                                                                                                                    | 1.33 | 0.07      | 0.00    | 1.20     | 1.48     |
| Note: Regression results from the sensitivity analysis using a Logit model. Number of person weeks = 6,645,376. We included controls for year of birth, calendar week, region of residence, country of birth, sex and parents' country of birth. Standard errors are clustered at the municipality level. |      |           |         |          |          |

Supplemental Table 3A: Event study estimates from the sensitivity analysis of the effect of relative week according to week Delta and Omicron variant on GP use in children aged 0-1 years

| Age 0-1        |      |       |           |      |                      |      |
|----------------|------|-------|-----------|------|----------------------|------|
|                | Odds | Ratio | Std. Err. | z    | [95% Conf. Interval] |      |
| <b>Omicron</b> |      |       |           |      |                      |      |
| Week -5        | 1.59 | 0.32  | 2.30      | 0.02 | 1.07                 | 2.37 |

|              |      |      |       |      |      |      |
|--------------|------|------|-------|------|------|------|
| Week -4      | 1.31 | 0.18 | 1.98  | 0.05 | 1.00 | 1.72 |
| Week -3      | 1.02 | 0.15 | 0.12  | 0.91 | 0.76 | 1.37 |
| Week -2      | 1.11 | 0.16 | 0.72  | 0.47 | 0.83 | 1.49 |
| Week -1      | 1.00 |      |       |      |      |      |
| Week 0       | 5.61 | 0.64 | 15.13 | 0.00 | 4.48 | 7.01 |
| Week 1       | 4.24 | 0.55 | 11.21 | 0.00 | 3.30 | 5.46 |
| Week 2       | 1.36 | 0.28 | 1.49  | 0.14 | 0.91 | 2.03 |
| Week 3       | 0.99 | 0.24 | -0.04 | 0.97 | 0.62 | 1.59 |
| Week 4       | 1.51 | 1.11 | 0.56  | 0.57 | 0.36 | 6.36 |
| <b>Delta</b> |      |      |       |      |      |      |
| Week -5      | 0.37 | 0.37 | -1.00 | 0.32 | 0.05 | 2.60 |
| Week -4      | 1.07 | 0.28 | 0.24  | 0.81 | 0.63 | 1.80 |
| Week -3      | 1.36 | 0.29 | 1.42  | 0.16 | 0.89 | 2.07 |
| Week -2      | 1.27 | 0.21 | 1.46  | 0.14 | 0.92 | 1.76 |
| Week -1      | 1.00 |      |       |      |      |      |
| Week 0       | 5.75 | 0.52 | 19.39 | 0.00 | 4.82 | 6.87 |
| Week 1       | 4.47 | 0.96 | 7.01  | 0.00 | 2.94 | 6.80 |
| Week 2       | 1.17 | 0.18 | 1.02  | 0.31 | 0.86 | 1.60 |
| Week 3       | 1.27 | 0.17 | 1.79  | 0.07 | 0.98 | 1.66 |
| Week 4       | 1.78 | 0.24 | 4.22  | 0.00 | 1.36 | 2.33 |

Supplemental Table 3B: Event study estimates from the sensitivity analysis of the effect of relative week according to week Delta and Omicron variant on GP use in children aged 2-5 years

| Age 2-5        |      |       |           |      |                      |      |
|----------------|------|-------|-----------|------|----------------------|------|
|                | Odds | Ratio | Std. Err. | z    | [95% Conf. Interval] |      |
| <b>Omicron</b> |      |       |           |      |                      |      |
| Week -5        | 1.15 | 0.12  | 1.35      | 0.18 | 0.94                 | 1.41 |
| Week -4        | 1.15 | 0.12  | 1.32      | 0.19 | 0.93                 | 1.42 |
| Week -3        | 1.00 | 0.12  | 0.03      | 0.98 | 0.79                 | 1.28 |

|              |      |      |       |      |      |      |
|--------------|------|------|-------|------|------|------|
| Week -2      | 0.97 | 0.15 | -0.19 | 0.85 | 0.72 | 1.31 |
| Week -1      | 1.00 |      |       |      |      |      |
| Week 0       | 6.04 | 0.70 | 15.40 | 0.00 | 4.80 | 7.59 |
| Week 1       | 4.82 | 0.71 | 10.75 | 0.00 | 3.62 | 6.43 |
| Week 2       | 1.47 | 0.21 | 2.70  | 0.01 | 1.11 | 1.95 |
| Week 3       | 1.48 | 0.25 | 2.30  | 0.02 | 1.06 | 2.08 |
| Week 4       | 1.08 | 0.57 | 0.15  | 0.88 | 0.38 | 3.04 |
| <b>Delta</b> |      |      |       |      |      |      |
| Week -5      | 1.62 | 0.44 | 1.77  | 0.08 | 0.95 | 2.75 |
| Week -4      | 1.31 | 0.28 | 1.25  | 0.21 | 0.86 | 1.98 |
| Week -3      | 1.27 | 0.23 | 1.37  | 0.17 | 0.90 | 1.80 |
| Week -2      | 1.11 | 0.15 | 0.75  | 0.45 | 0.85 | 1.44 |
| Week -1      | 1.00 |      |       |      |      |      |
| Week 0       | 6.70 | 0.55 | 22.97 | 0.00 | 5.70 | 7.88 |
| Week 1       | 5.66 | 0.62 | 15.78 | 0.00 | 4.56 | 7.02 |
| Week 2       | 1.69 | 0.16 | 5.55  | 0.00 | 1.41 | 2.04 |
| Week 3       | 1.25 | 0.12 | 2.38  | 0.02 | 1.04 | 1.50 |
| Week 4       | 1.48 | 0.15 | 3.89  | 0.00 | 1.21 | 1.80 |

Supplemental Table 3C: Event study estimates from the sensitivity analysis of the effect of relative week according to week Delta and Omicron variant on GP use in children aged 6-10 years

| Age 6-10       |      |       |           |      |                      |      |
|----------------|------|-------|-----------|------|----------------------|------|
|                | Odds | Ratio | Std. Err. | z    | [95% Conf. Interval] |      |
| <b>Omicron</b> |      |       |           |      |                      |      |
| Week -5        | 0.74 | 0.09  | -2.45     | 0.01 | 0.58                 | 0.94 |
| Week -4        | 0.92 | 0.08  | -0.97     | 0.33 | 0.79                 | 1.08 |
| Week -3        | 0.96 | 0.12  | -0.37     | 0.71 | 0.75                 | 1.21 |
| Week -2        | 0.79 | 0.10  | -1.77     | 0.08 | 0.61                 | 1.03 |
| Week -1        | 1.00 |       |           |      |                      |      |

|              |      |      |       |      |      |       |
|--------------|------|------|-------|------|------|-------|
| Week 0       | 7.10 | 0.82 | 17.00 | 0.00 | 5.66 | 8.89  |
| Week 1       | 6.07 | 0.83 | 13.12 | 0.00 | 4.63 | 7.94  |
| Week 2       | 1.53 | 0.15 | 4.33  | 0.00 | 1.26 | 1.85  |
| Week 3       | 1.28 | 0.18 | 1.74  | 0.08 | 0.97 | 1.69  |
| Week 4       | 0.51 | 0.18 | -1.92 | 0.05 | 0.25 | 1.01  |
| <b>Delta</b> |      |      |       |      |      |       |
| Week -5      | 0.72 | 0.25 | -0.93 | 0.35 | 0.37 | 1.43  |
| Week -4      | 1.15 | 0.20 | 0.79  | 0.43 | 0.82 | 1.60  |
| Week -3      | 1.14 | 0.17 | 0.89  | 0.38 | 0.85 | 1.53  |
| Week -2      | 0.85 | 0.10 | -1.45 | 0.15 | 0.68 | 1.06  |
| Week -1      | 1.00 |      |       |      |      |       |
| Week 0       | 9.39 | 0.62 | 33.97 | 0.00 | 8.25 | 10.69 |
| Week 1       | 8.36 | 1.16 | 15.29 | 0.00 | 6.36 | 10.97 |
| Week 2       | 1.35 | 0.09 | 4.26  | 0.00 | 1.17 | 1.54  |
| Week 3       | 1.25 | 0.09 | 2.98  | 0.00 | 1.08 | 1.45  |
| Week 4       | 1.15 | 0.10 | 1.59  | 0.11 | 0.97 | 1.38  |

Supplemental table 4: Event study estimates of the effect of relative week according to week delta and omicron variant on GP use from the 29th of November 2021 until 23rd of January 2022, adjusted for municipality-specific time trends.

Supplemental Table 4: Event study estimates from the sensitivity analysis of the effect of relative week according to week Delta and Omicron variant on GP use, adjusted for continuous time-by-municipality fixed effects

|                                   |         |      |           |      |      |                      |      |
|-----------------------------------|---------|------|-----------|------|------|----------------------|------|
| justert for kommun e-tids-trender |         |      |           |      |      |                      |      |
|                                   |         | Odds | Std. Err. | z    | p    | [95% Conf. Interval] |      |
|                                   | Omicron |      |           |      |      |                      |      |
|                                   | -5      | 1.02 | 0.11      | 0.24 | 0.81 | 0.84                 | 1.25 |

|  |       |      |      |       |      |      |      |
|--|-------|------|------|-------|------|------|------|
|  | -4    | 1.07 | 0.08 | 0.96  | 0.34 | 0.93 | 1.23 |
|  | -3    | 0.97 | 0.08 | -0.30 | 0.77 | 0.83 | 1.15 |
|  | -2    | 0.91 | 0.08 | -1.12 | 0.27 | 0.77 | 1.08 |
|  | -1    | 0.00 |      |       |      |      |      |
|  | 0     | 6.65 | 0.69 | 18.30 | 0.00 | 5.43 | 8.14 |
|  | 1     | 5.48 | 0.72 | 12.92 | 0.00 | 4.23 | 7.09 |
|  | 2     | 1.50 | 0.12 | 5.10  | 0.00 | 1.29 | 1.76 |
|  | 3     | 1.31 | 0.14 | 2.49  | 0.01 | 1.06 | 1.63 |
|  | 4     | 0.85 | 0.29 | -0.47 | 0.64 | 0.43 | 1.67 |
|  | Delta |      |      |       |      |      |      |
|  | -5    | 0.98 | 0.24 | -0.07 | 0.94 | 0.61 | 1.59 |
|  | -4    | 1.19 | 0.18 | 1.13  | 0.26 | 0.88 | 1.61 |
|  | -3    | 1.21 | 0.11 | 2.07  | 0.04 | 1.01 | 1.44 |
|  | -2    | 0.97 | 0.07 | -0.45 | 0.65 | 0.83 | 1.12 |
|  | -1    | 0.00 |      |       |      |      |      |
|  | 0     | 8.21 | 0.53 | 32.80 | 0.00 | 7.24 | 9.31 |
|  | 1     | 7.10 | 0.93 | 14.96 | 0.00 | 5.49 | 9.18 |
|  | 2     | 1.39 | 0.08 | 5.65  | 0.00 | 1.24 | 1.56 |
|  | 3     | 1.26 | 0.08 | 3.67  | 0.00 | 1.11 | 1.42 |
|  | 4     | 1.34 | 0.08 | 4.87  | 0.00 | 1.19 | 1.50 |

View Only

1  
2  
3 **General practitioner visits after SARS-CoV-2 omicron compared to the delta variant in**  
4 **children in Norway: a prospective nationwide registry study**  
5  
6

7 Sigurd Storehaug Arntzen, MPhil<sup>1</sup>, Hege Marie Gjefsen, PhD<sup>1</sup>, Kjetil Elias Telle, PhD<sup>1</sup>,  
8 Karin Magnusson, PhD<sup>1</sup>, Ketil Størdal, MD PhD<sup>2</sup>, Siri Håberg, MD PhD<sup>3</sup>, Jonas Minet  
9 Kinge, PhD<sup>1,3,4</sup>  
10

11  
12 <sup>1</sup> Cluster for Health Services Research, Norwegian Institute of Public Health

13 <sup>2</sup> Division of Paediatric and Adolescent Medicine, University of Oslo

14 <sup>3</sup> Centre for Fertility and Health, Norwegian Institute of Public Health

15 <sup>4</sup> Department of Health Management and Health Economics, University of Oslo  
16  
17

18 **Address correspondence to:** Jonas Minet Kinge, Norwegian Institute of Public Health,  
19 Postboks 222, Skøyen, N-0213 Oslo  
20 E-mail: [jonas.minet.kinge@fhi.no](mailto:jonas.minet.kinge@fhi.no)  
21  
22

23  
24 **Conflict of Interest Disclosures (includes financial disclosures):** The authors have no  
25 example conflicts of interest to disclose.  
26  
27

28 **Funding/Support: Funding:** The study was internally funded by the Norwegian Institute of  
29 Public Health and externally by the Research Council of Norway (project no 262700). The  
30 funding sources had no influence over the design and conduct of the study; collection,  
31 management, analysis, and interpretation of the data; preparation, review, or approval of the  
32 manuscript; or decision to submit the manuscript for publication.  
33  
34  
35  
36  
37  
38  
39  
40  
41  
42  
43  
44  
45  
46  
47  
48  
49  
50  
51  
52  
53  
54  
55  
56  
57  
58  
59  
60



### What is already known on this topic

SARS-CoV-2 in children is known to lead to an immediate increase in primary care utilization for 1-2 weeks after a positive test, before quickly falling back to pre-infection utilization levels. The difference in primary care utilization following infection with the delta and omicron virus variants is unknown.

### What this study adds

A sudden increase in primary care use was observed in children who tested positive for SARS-CoV-2 in the two weeks after the test. After the first two weeks, the primary care utilization returned to pre-infection levels.

The increase in primary care utilization was higher for children infected with the delta than the omicron variant. Compared to the delta variant, the omicron variant is likely to result in less pressure on primary care services ~~for per~~ infected ~~children~~child.

1  
2  
3  
4  
5  
6  
7  
8  
9  
10  
11  
12  
13  
14  
15  
16  
17  
18  
19  
20  
21  
22  
23  
24  
25  
26  
27  
28  
29  
30  
31  
32  
33  
34  
35  
36  
37  
38  
39  
40  
41  
42  
43  
44  
45  
46  
47  
48  
49  
50  
51  
52  
53  
54  
55  
56  
57  
58  
59  
60

Confidential: For Review Only

**Abstract:**

**Background:** SARS-CoV-2 infection in children is followed by an immediate increase in primary care utilization. The difference in utilization following infection with the delta and omicron virus variants is unknown.

**Objectives:** To study whether general practitioner (GP) contacts ~~are~~were different in children infected with the omicron vs delta variant, for up to ~~five~~four weeks after the ~~infection~~week testing positive.

**Setting:** Primary care

**Participants:** All residents in Norway aged 0-10. After excluding 47,683 children with a positive test where the virus variant was not identified as delta or omicron and 474 children who were vaccinated, the primary study population consisted of 613,448 children.

**Main outcome measures:** GP ~~visit~~visits

**Methods:** We estimated the difference in the weekly share visiting the GP after being infected with the delta or omicron variant to those in the study population who were either not tested or who tested negative, using an event-study design, controlling for calendar week of consultation, municipality fixed effects and sociodemographic factors in multivariate logistic regressions.

**Results:** Compared with pre-infection, increased GP utilization was found for children 1 and 2 weeks after testing positive for the omicron variant, with an odds ratio (OR) of 6.7 (Std.err: 0.69) in the first week and 5.5 (0.72) in the second. This increase was more pronounced for children with the delta variant, with an OR of 8.2 (0.52) in the first week and 7.1 (0.93) in the second. After 2 weeks, the GP utilization returned to pre-infection levels.

**Conclusion:** The omicron variant ~~is likely~~appears to result~~have resulted~~ in less ~~pressure on~~ primary health care ~~services for children~~interactions per infected child, compared with the delta variant.

1  
2  
3  
4  
5  
6  
7  
8  
9  
10  
11  
12  
13  
14  
15  
16  
17  
18  
19  
20  
21  
22  
23  
24  
25  
26  
27  
28  
29  
30  
31  
32  
33  
34  
35  
36  
37  
38  
39  
40  
41  
42  
43  
44  
45  
46  
47  
48  
49  
50  
51  
52  
53  
54  
55  
56  
57  
58  
59  
60

Confidential: For Review Only

## Introduction

SARS-CoV-2 for children is often referred to as leading to milder symptoms than in adults,<sup>1</sup> and recent studies found no increase in specialist care in children following infection.<sup>1-2</sup>

However, SARS-CoV-2 infection in children is followed by an immediate increase in primary care utilization, and recent reports ~~discuss~~have discussed whether the omicron variant might cause more severe symptoms than the delta variant in children.<sup>3-4</sup>

Survey data can be used to determine patterns of health care need following infection, however, reporting and response bias may affect the accuracy of the estimates. Except for a few studies using registry data from a period dominated by delta and other earlier variants, little is known about the impact of SARS-CoV-2 on post-covid health care utilization in children<sup>2</sup>. Furthermore, we also do not know whether healthcare use among children and adolescents increases after initial omicron infection and whether this increase, if any, is comparable to the increase in utilization after infection with the delta variant. Such knowledge could be used to upscale or downscale the health care services.

Because the omicron variant has been found to cause less severe symptoms than the delta variant in adults, we ~~hypotezized~~hypotesized that a comparable pattern would be found for children. The aim of this analysis was to compare general practitioner (GP) contacts among children in the ~~five~~four weeks after being infected with the omicron or delta variants.

## Methods

Data used for this project was from the Emergency Preparedness Register (Beredt C19). The establishment of an emergency preparedness register forms part of the legally mandated responsibilities of the Norwegian Institute of Public Health during epidemics. The Ethics

1  
2  
3 Committee of South-East Norway confirmed (4 June 2020, #153204) that external ethical  
4  
5 board review was not required.  
6  
7  
8  
9

### 10 *Data Sources*

11  
12 To estimate the share of children aged 0-10 years old visiting the GP after being infected with  
13  
14 delta or omicron variant we used population wide longitudinal registry data from Norway.  
15  
16 BeredtC19 is an emergency preparedness register that aims to rapidly provide ongoing  
17  
18 overview and knowledge of the prevalence, causal relationships, and consequences of the  
19  
20 COVID-19 epidemic in Norway. It includes information from various data sources that are  
21  
22 updated daily, including the Norwegian surveillance system for communicable diseases (all  
23  
24 testing and screening for SARS-CoV-2), the National Population Register (age, sex, country  
25  
26 of birth, the National Immunization Register (vaccination status), and the Norway Control  
27  
28 and Payment of Health Reimbursement (all physical and electronic consultations with all  
29  
30 general practitioners). -A more in-depth summary of the data sources used for our analysis  
31  
32 are available in the Appendix Supplementary Table 1.  
33  
34  
35  
36  
37  
38  
39

### 40 *Study Population*

41  
42 We followed all Norwegian residents aged 0-10 years from the 29<sup>th</sup> of November 2021 until  
43  
44 23<sup>rd</sup> of January 2022. Figure 1 shows the share of the sequenced PCR tests that were delta or  
45  
46 omicron variant from the 29<sup>th</sup> of November until the 23<sup>rd</sup> of January. Children who tested  
47  
48 positive but whose tests were not sequenced, and children who had been vaccinated, were  
49  
50 excluded from the analysis. The upper age cut-off at 10 was set as children who turned 11 at  
51  
52 the start of the period, turned 12 during the study period and thus become eligible for the  
53  
54 vaccine.  
55  
56  
57  
58  
59  
60

1  
2  
3 The categorical outcome variable for GP contact was set to 1 if the individual had at least one  
4 physical- or e-consultation with a GP in a week, and 0 otherwise. In Norway, consultations  
5 with the GP are free for children aged below 16. The GPs serve as the first line in the health  
6 care services, prescribing medicines and performing simple procedures, and referring patients  
7 to further care when necessary.  
8  
9

### 10 11 12 13 14 15 16 17 *Statistical design*

18  
19 We constructed a data set including one observation per individual per week from week 48 of  
20 2021 until the 3rd week of 2022. Each week, each individual could either be registered with  
21 a GP consultation or not. For the individuals that were infected with covid-19, we constructed  
22 an index week of infection. For each index week, persons with omicron or delta were  
23 compared to persons without omicron or delta. Event time was indicated relative to the index  
24 week of covid-19 infection for each person and was our main variable of interest explaining  
25 primary health care use for omicron and delta variant, respectively.  
26  
27  
28  
29  
30  
31  
32  
33  
34  
35  
36  
37

38 Multivariate logistic regression was used to estimate adjusted odds ratios (aOR) with 95%  
39 confidence intervals (CI) for GP consultations. Exploiting the longitudinal nature of the data,  
40 we used an event-study design<sup>55,6</sup>, controlling for calendar week of consultation, municipality  
41 fixed effects and sociodemographic characteristics.  
42  
43  
44  
45  
46  
47  
48

49 The event-study is especially well suited when the timing of events varies across groups in  
50 the population, there is a high number of units not experiencing an event and any measured  
51 association might vary over time<sup>7</sup>. The approach is widely used in social sciences and now  
52 also increasingly popular in epidemiology and public health as it can display an abnormal  
53 shift in trend, and attribute that shift to an event<sup>8-12</sup>.  
54  
55  
56  
57  
58  
59  
60

The temporal aORs of being infected by omicron and delta were estimated from 5 weeks before to 4 weeks after the week 0 of infection. We regress weeks to and from confirmed positive test on binary GP visits using the following expression:

$$y_{iw} = \theta_w + \theta_i + \sum_{k=-5, k \neq -1}^{k=5} \delta_{k(iw)} \alpha_k + \sum_{k=-5, k \neq -1}^{k=5} \sigma_{k(iw)} \beta_k + \epsilon_{iw}$$

$$\sigma(y_{iw}) = 1 / (1 + e^{-y_{iw}})$$

$$y_{iw} = \theta_w + \theta_i + \sum_{k=-5, k \neq -1}^{k=5} \delta_{k(iw)} \alpha_k + \sum_{k=-5, k \neq -1}^{k=5} \sigma_{k(iw)} \beta_k + \epsilon_{iw}$$

Where  $y_{iw}$  is the outcome for individual  $i$  in week  $w$ — $\delta_k$ , i.e., GP visits.  $\theta_w$  is a set of timedummy variables, indicating that there are  $k$  weeks relative to the week in which the individual got infected with the delta virus. Similarly,  $\sigma_k$  indicates that there are  $k$  weeks relative to the week in which the individual got infected with the omicron virus.  $\theta_w$  are event-specific fixed effects for calendar week  $w$ , accounting for any changes in the inclination to visit a GP due to e.g., capacity constraints or holidays.  $\theta_i$  denotes background characteristics for individual  $i$  including gender, age dummies, parental country background and the child's country background, as well as municipality fixed effects.  $\epsilon_{iw}$  is the standard error clustered at a set of time dummy variables, indicating the event time, i.e., the number of weeks  $k$  relative to the week in which the individual got infected with the delta virus, taking the value 0 if not being infected with the delta virus. Similarly,  $\sigma_k$  municipality level is a set of dummy variables for event time in the case of infection with the omicron variant. The week prior to the infection,  $k = -1$ , is used as our reference value, and this value is therefore omitted from the regression. Our primary parameters of interests are the  $\beta_k$  and  $\alpha_k$  and



~~$\beta_k$  attached to the event time dummies. These will capture the changes in our outcome variable the probability of visiting the GP among the children infected with delta and omicron relative to the comparison group consisting of uninfected or non-tested  $\epsilon_{itw}$  children. was the standard error clustered at the municipality level.~~

The coefficients  $\delta_k$  and  $\sigma_k$  for  $k < 0$  indicate the pre-trends GP use develops prior to infection time, while  $k > 0$  described how the outcome changes after getting infected with either delta or omicron virus. Hence, the event-study framework allows for testing whether infected children followed the same patterns for GP visits as the noninfected. The reference category was 1 week prior to infection and noninfected individuals were included as controls prior to infection, and whether this pattern changed after the week 0 of infection. A discontinuous jump in the probability of visiting the GP around week 0 indicates an estimated difference in the probability of visiting the GP between the individuals infected with omicron or delta, and our comparison groups consisting of noninfected individuals.

In the Online Appendix we present robustness checks of our results by varying the time period of our analysis, age stratified analysis and results of analysis with additional adjustment for municipality-specific time trends.

#### *Patient and public involvement*

No patients were involved in setting the research question or the outcome measures, nor were they involved in developing plans for recruitment, design, or implementation of the study. No patients were asked to advise on interpretation or writing up of results. There are no plans to disseminate the results of the research to study participants or the relevant patient community.

## Results

In total, 661,587 children, aged 0–10 years, were residing in Norway in the study period.

After excluding 474 children who were vaccinated and 47,665 children with positive tests during the study period where the virus variant was not identified as delta or omicron, the primary study population consisted of 613,448 children comprising 4,907,584 person-weeks.

Figure 1 shows that delta was the dominant virus variant at the beginning of our study period, while omicron was the dominant variant at the end of our study period. Persons with omicron were older and more often born abroad than persons with delta, though the sex distribution was similar (Table 1).

Table 2 shows descriptive statistics of the estimated sample, indicating that the fraction that visited the GP in the weeks before infection was similar for the children later infected with omicron and delta, and for those who either were not infected or not tested for SARS-CoV-2.

The event study plot ~~showingshows~~ higher GP utilization following omicron, compared with delta (Figure 2). The aORs of 8.19 (std.err: 0.52) in the first and 7.10 (0.93) in the second week after delta were higher than comparable estimates for omicron of 6.67 (0.69) and 5.51 (0.72) in week one and two respectively. Higher GP utilization was also found for children 4 weeks after testing positive for both omicron and delta. Higher utilization was also found ~~fivefour~~ weeks after testing positive for delta but returned to pre-infection levels in week ~~54~~ for omicron cases (see Table 3 for details).

Results from ~~robustness control~~when varying included time-period were similar (Supplemental Table 2).-The results were also replicated in each age strata (Supplemental

1  
2  
3 Tables 3A-C). The results were also robust to analysis including municipality-specific time  
4 trends (Supplemental Table 4).  
5  
6  
7  
8  
9

## 10 **Discussion**

11  
12 In this study of 613,448 Norwegian children aged 0-10 years, we found increased GP  
13 utilization for children 1 and 2 weeks after testing positive for the omicron variant, with  
14 similar and more pronounced increases for children with the delta variant. Our findings  
15 suggest that omicron will place less pressure on the primary care services per case. ~~However,~~  
16 ~~given the higher transmissibility of the omicron than the delta variant it can still lead to a high~~  
17 ~~burden on the health care system.~~<sup>6</sup>  
18  
19  
20  
21  
22  
23  
24  
25  
26  
27  
28

29 ~~We could find no study for comparison of our findings, i.e. to our knowledge, the present~~  
30 ~~study is the first to shed light on healthcare use following the omicron vs delta variant in~~  
31 ~~children.~~  
32  
33  
34  
35  
36  
37

38 In the week following positive test 16% of children with delta visited the GP, compared with  
39 12% with omicron. After one week, this percent dropped to 13 and 11 percent for children  
40 with delta and omicron, respectively. This suggest less pressure on the services from  
41 omicron. However, if caseload is substantially increased, it might outweigh the reduced  
42 pressure per case. The overall pressure on the health care system is a product of how many  
43 are infected and their inclination to use the health care system. Even if the inclination is  
44 overall lower with omicron, the pressure on the health care system can be higher if the  
45 number of infected is sufficiently high.  
46  
47  
48  
49  
50  
51  
52  
53  
54  
55  
56  
57  
58  
59  
60

1  
2  
3 A number of reports of the omicron variant in adults ~~suggests~~suggested less serious illness<sup>7</sup>;  
4 ~~i.e. another possible interpretation of already a few weeks after the initial reports of the new~~  
5 ~~variant~~<sup>13</sup>. Thus, our findings may be ~~that omicron is perceived as less severe, compared with~~  
6 ~~the delta variant, lowering the affected by~~ parents' perceived less need to seek healthcare  
7  
8 after omicron in their children, than after delta. However, a key strength of our analysis ~~is~~was  
9  
10 that both delta and omicron were circulating during our study period, and ~~we~~the parents were  
11  
12 not informed which strain they were infected with. Hence, given that we adjust for overall  
13  
14 time trend, it is unlikely that a difference in the perceived relative severity of the two strains  
15  
16 was the main driver of our results. One exception is that if infection with the delta and  
17  
18 omicron variant differed in symptoms, known to the parents, the parents could have reacted  
19  
20 accordingly.

21  
22  
23  
24  
25  
26  
27  
28  
29  
30 There might very well have been fluctuations in the inclination for GP visits over time. We  
31  
32 adjusted for calendar week in our regression models. Hence, making it is less likelyunlikely  
33  
34 that the results ~~are~~were driven by general changes in the inclination to contact the GP. As  
35  
36 both virus strains were present in all weeks included in our analysis, changes due to e.g. high  
37  
38 pressure on GPs or an overall impression of omicron being less severe should be addressed  
39  
40 by the week-fixed effects. In addition, ~~it includes~~our analysis included data covering all  
41  
42 children residing in Norway, which ~~reduced~~reduced attrition and sample selection bias.

43  
44  
45  
46  
47  
48  
49 Based on national recommendations in Norway, healthy children below age 12 are mostly  
50  
51 unvaccinated.<sup>8,14</sup> PCR tests are freely available and a proportion of these are screened for  
52  
53 variants of concern. Several of the most populous municipalities in Norway had implemented  
54  
55 mass testing in the schools before the first case of omicron was detected in Norway in late  
56  
57 November 2021. However, throughout the study period, it was the norm that all positive  
58  
59  
60

1  
2  
3 rapid antigen home tests had to be confirmed with a PCR-test. The increasing use of rapid  
4  
5 antigen home tests ~~iswas~~ therefore unlikely to seriously bias our estimates.  
6  
7  
8  
9

10 A limitation of the study ~~iswas~~ that asymptomatic children might have been less likely to  
11 have a PCR-test. If, for example, asymptomatic SARS-CoV-2 infection was more common  
12 for the omicron than the delta variant, we might have underestimated the difference between  
13 them. -Also, our findings may not be generalizable to countries without equal and free access  
14 to healthcare and PCR testing for SARS-CoV-2 for all inhabitants. Finally, ~~for continuous~~  
15 ~~surveillance purposes, 25% of SARS-CoV-2 positive samples or up to 100 samples per week~~  
16 ~~per local laboratory is sent to a reference laboratory for whole genome sequencing. When~~  
17 ~~omicron emerged in Norway in late November 2021, the laboratories were requested to~~  
18 ~~perform variant analyses locally on all positive samples. If this was not possible for there have~~  
19 ~~been variation in the tests that were sequenced over time. For~~ capacity reasons, samples  
20 suspected to contain the omicron variant ~~waswere~~ prioritized for variant analyses: ~~for a part~~  
21 ~~of the period.~~ This might have led to variation in the tests that were sequenced over time ~~and~~  
22 ~~therefore potentially the composition of the groups.~~  
23  
24  
25  
26  
27  
28  
29  
30  
31  
32  
33  
34  
35  
36  
37  
38  
39  
40  
41

## 42 **Conclusion**

43  
44 Our findings ~~showshowed~~ that per positive test in children aged 0 to 10 years, the omicron  
45 variant ~~iswas~~ likely to result in ~~less pressure on the health care system fewer consultations per~~  
46 ~~positive tested children,~~ than the delta variant. However, the omicron variant ~~iswas~~ still  
47 associated with ~~increased utilization higher total number of consultations,~~ and ~~it can still could~~  
48 lead to a high burden on the health care system when the ~~community number of children~~  
49 ~~infected with~~ omicron ~~cases~~ are high.  
50  
51  
52  
53  
54  
55  
56  
57  
58  
59  
60

## References:

1. Dhochak N, Singhal T, Kabra S, et al. Pathophysiology of COVID-19: why children fare better than adults? *The Indian Journal of Pediatrics* 2020;87(7):537-46.
2. Magnusson K, Skyrud KD, Suren P, et al. Healthcare use in 700 000 children and adolescents for six months after covid-19: before and after register based cohort study. *BMJ* 2022;376:e066809. doi: 10.1136/bmj-2021-066809
3. Kozlov M. Does Omicron hit kids harder? Scientists are trying to find out: Nature Web Site; 2022 [accessed 23.02. 2022].
4. Sigal A, Milo R, Jassat W. Estimating disease severity of Omicron and Delta SARS-CoV-2 infections. *Nature Reviews Immunology* 2022 doi: 10.1038/s41577-022-00720-5
5. ~~Bailey MJ, Goodman-Bacon A. The War on Poverty's Experiment in Public Medicine: Community Health Centers and the Mortality of Older Americans. *American Economic Review* 2015;105(3):1067-104. doi: 10.1257/aer.20120070~~ Sun L, Abraham S. Estimating dynamic treatment effects in event studies with heterogeneous treatment effects. *Journal of Econometrics* 2021;225(2):175-99. doi: <https://doi.org/10.1016/j.jeconom.2020.09.006>
6. ~~Jørgensen SB, Nygård K, Kacelnik O, et al. Secondary Attack Rates~~ Dimick JB, Ryan AM. Methods for Omicron and Delta Variants of SARS-CoV-2 ~~Evaluating Changes~~ in Norwegian Households. *Health Care Policy: The Difference-in-Differences Approach. JAMA* 2022;2014;312(22):2401-02. doi: 10.1001/jama.2022.3780
- 7.7. Goodman-Bacon A. Difference-in-differences with variation in treatment timing. *Journal of Econometrics* 2021;225(2):254-77.
8. Ly DP, Essien UR, Olenski AR, et al. Affirmative action bans and enrollment of students from underrepresented racial and ethnic groups in US public medical schools. *Annals of Internal Medicine* 2022
9. Auger N, Naimi AI, Smargiassi A, et al. Extreme heat and risk of early delivery among preterm and term pregnancies. *Epidemiology* 2014;344-50.
10. Abouk R, Pacula RL, Powell D. Association between state laws facilitating pharmacy distribution of naloxone and risk of fatal overdose. *JAMA internal medicine* 2019;179(6):805-11.
11. Schnake-Mahl AS, O'Leary G, Mullachery PH, et al. The impact of keeping indoor dining closed on COVID-19 rates among large US cities: a quasi-experimental design. *Epidemiology* 2021;33(2):200-08.
12. Ghosh AK, Venkatraman S, Soroka O, et al. THE EFFECT OF SOCIAL DISTANCING MEASURES ON COVID-19 RELATED HOSPITALIZATION IN NEW YORK: AN EVENT STUDY EXAMINING THE ROLE OF OVERCROWDED HOUSLNG. *Journal of General Internal Medicine* 2021:S77-S77.
13. Veneti L, Bøås H, Kristoffersen AB, et al. Reduced risk of hospitalisation among reported COVID-19 cases infected with the SARS-CoV-2 Omicron BA. 1 variant compared with the Delta variant, Norway, December 2021 to January 2022. *Eurosurveillance* 2022;27(4):2200077.
814. Coronavirus vaccine - information for the public: The Norwegian Institute of Public Health (NIPH); 2022 [updated 28.02.2022. Available from: <https://www.fhi.no/en/id/vaccines/coronavirus-immunisation-programme/coronavirus-vaccine/#vaccination-of-children-and-adolescents> accessed 01.03. 2022.

**Table 1: Summary statistics of the estimation sample**

|                                   | Omicron   | Delta     | Rest      |
|-----------------------------------|-----------|-----------|-----------|
| N                                 | 7,046     | 14,369    | 592,033   |
| Person-weeks                      | 56,368    | 114,952   | 4,736,264 |
| Age, mean (SD)                    | 6.1 (3.1) | 6.9 (2.8) | 5.1 (3.2) |
| Born Foreign Country, (%)         | 7.2       | 6.3       | 5.5       |
| Parents foreign Born Country, (%) | 53.7      | 43.0      | 38.8      |
| Boys, (%)                         | 51.3      | 51.4      | 51.3      |

Notes: Standard deviation in brackets

Table 2: Descriptive statistics of the estimated sample

| Relative week | Delta                            |                  |                                    | Omicron                          |                  |                                    |
|---------------|----------------------------------|------------------|------------------------------------|----------------------------------|------------------|------------------------------------|
|               | Person-weeks with GP Appointment | Persons infected | Fraction Share with GP appointment | Person-weeks with GP appointment | Persons infected | Share Fraction with GP appointment |
| -5            | 19145                            | 6924,975         | 0.03                               | 14519                            | 4,975692         | 0.03                               |
| -4            | 55176                            | 1,6226,126       | 0.03                               | 17655                            | 6,1261,622       | 0.03                               |
| -3            | 113147                           | 3,4526,600       | 0.0302                             | 147113                           | 6,6003,452       | 0.0203                             |
| -2            | 187120                           | 7,4456,902       | 0.0302                             | 120187                           | 6,9027,445       | 0.0203                             |
| -1            | 259125                           | 11,6367,024      | 0.02                               | 125259                           | 7,02411,636      | 0.02                               |
| 0             | 8462,285                         | 7,04614,369      | 0.1612                             | 2,285846                         | 14,3697,046      | 0.1216                             |
| 1             | 6741,795                         | 6,26314,351      | 0.1311                             | 1,795674                         | 14,3516,263      | 0.1113                             |
| 2             | 335136                           | 14,1774,133      | 0.0203                             | 136335                           | 4,13314,177      | 0.0302                             |
| 3             | 28260                            | 13,6772,071      | 0.0203                             | 60282                            | 2,07113,677      | 0.0302                             |
| 4             | 30417                            | 12,74792,0       | 0.02                               | 17304                            | 92012,747        | 0.02                               |

Table 3: Event study estimates of the effect of relative week according to week delta and omicron variant on GP use from the 29<sup>th</sup> of November 2021 until 23<sup>rd</sup> of January 2022.

| Relative Week                                                                                                                                                                                                                                                                                                                   | OR              | Std. Err.     | P-value       | Lower CI         | Upper CI        | Test for equal OR (P-value)* |
|---------------------------------------------------------------------------------------------------------------------------------------------------------------------------------------------------------------------------------------------------------------------------------------------------------------------------------|-----------------|---------------|---------------|------------------|-----------------|------------------------------|
| <b>Omicron</b>                                                                                                                                                                                                                                                                                                                  |                 |               |               |                  |                 |                              |
| Week -5                                                                                                                                                                                                                                                                                                                         | <u>1.2002</u>   | <u>0.1011</u> | <u>0.0386</u> | <u>1.020.83</u>  | <u>1.4225</u>   | <u>0.85</u>                  |
| Week -4                                                                                                                                                                                                                                                                                                                         | <u>1.0207</u>   | <u>0.1108</u> | <u>0.8637</u> | <u>0.8393</u>    | <u>1.2523</u>   | <u>0.53</u>                  |
| Week -3                                                                                                                                                                                                                                                                                                                         | <u>1.070.97</u> | 0.08          | <u>0.3775</u> | <u>0.9383</u>    | <u>1.2315</u>   | <u>0.13</u>                  |
| Week -2                                                                                                                                                                                                                                                                                                                         | <u>0.9791</u>   | 0.08          | <u>0.7527</u> | <u>0.8377</u>    | <u>1.1508</u>   | <u>0.62</u>                  |
| Week -1                                                                                                                                                                                                                                                                                                                         | <u>0.911</u>    | <u>0.08</u>   | <u>0.27</u>   | <u>0.77</u>      | <u>1.08</u>     |                              |
| Week 0                                                                                                                                                                                                                                                                                                                          | 6.67            | 0.69          | 0.00          | 5.45             | 8.18            | <u>0.01</u>                  |
| Week 1                                                                                                                                                                                                                                                                                                                          | 5.51            | 0.72          | 0.00          | 4.26             | 7.12            | <u>&lt;0.01</u>              |
| Week 2                                                                                                                                                                                                                                                                                                                          | 1.51            | 0.12          | 0.00          | 1.29             | 1.77            | <u>0.46</u>                  |
| Week 3                                                                                                                                                                                                                                                                                                                          | 1.32            | 0.15          | 0.01          | 1.06             | 1.64            | <u>0.70</u>                  |
| Week 4                                                                                                                                                                                                                                                                                                                          | 0.86            | 0.29          | 0.65          | 0.44             | 1.68            | <u>0.18</u>                  |
| <b>Delta</b>                                                                                                                                                                                                                                                                                                                    |                 |               |               |                  |                 |                              |
| Week -5                                                                                                                                                                                                                                                                                                                         | <u>0.5897</u>   | <u>0.3724</u> | <u>0.3990</u> | <u>0.1660</u>    | <u>1.572.04</u> |                              |
| Week -4                                                                                                                                                                                                                                                                                                                         | <u>0.971.18</u> | <u>0.2418</u> | <u>0.9027</u> | <u>0.88</u>      | <u>01.60</u>    | <u>1.57</u>                  |
| Week -3                                                                                                                                                                                                                                                                                                                         | <u>1.1820</u>   | <u>0.1811</u> | <u>0.2704</u> | <u>1.01 0.88</u> | <u>1.6044</u>   |                              |
| Week -2                                                                                                                                                                                                                                                                                                                         | <u>0.961.20</u> | <u>0.1107</u> | <u>0.0463</u> | <u>0.831.01</u>  | <u>1.4412</u>   |                              |
| Week -1                                                                                                                                                                                                                                                                                                                         | <u>10.96</u>    | <u>0.07</u>   | <u>0.63</u>   | <u>0.83</u>      | <u>1.12</u>     |                              |
| Week 0                                                                                                                                                                                                                                                                                                                          | 8.19            | 0.52          | 0.00          | 7.24             | 9.27            |                              |
| Week 1                                                                                                                                                                                                                                                                                                                          | 7.10            | 0.93          | 0.00          | 5.50             | 9.17            |                              |
| Week 2                                                                                                                                                                                                                                                                                                                          | 1.39            | 0.08          | 0.00          | 1.24             | 1.56            |                              |
| Week 3                                                                                                                                                                                                                                                                                                                          | 1.26            | 0.08          | 0.00          | 1.11             | 1.42            |                              |
| Week 4                                                                                                                                                                                                                                                                                                                          | 1.34            | 0.08          | 0.00          | 1.19             | 1.50            |                              |
| Note: Regression results from the main specification using a Logit model. Number of person weeks = 4,907,584,906,952. We included controls for year of birth, calendar week, region of residence, country of birth, sex and parents' country of birth. Standard errors <del>are</del> were clustered at the municipality level. |                 |               |               |                  |                 |                              |
| * the column shows p-values from Wald-tests of equal OR for omicron versus delta, based on the regression output.                                                                                                                                                                                                               |                 |               |               |                  |                 |                              |

Figure 1: The development of delta and omicron cases in the estimated sample, week 48, 2021 – week 3, 2022. Share of sequenced samples with confirmed delta, omicron, and other results. [Figure1.pdf]



1  
2  
3  
4  
5  
6 **Figure 2: Event-study analysis of pre- and post-SARS-COV-2 trends in odds ratios for GP**  
7 **utilization by variant**

8 [Figure2.pdf]

9 Note: Estimates from logistic regression analysis on weekly data are reported. Adjusted odds ratios  
10 were estimated for indicator variables for relative week to omicron and delta and the omitted category  
11 defined as one week prior to infection, i.e week -1. Odds ratios were adjusted for age by including age  
12 indicators for 1 year age groups, sex, indicator for birth country and parental birth country, and  
13 municipality of residence. Standard errors ~~are~~were clustered at municipality level.  
14  
15  
16  
17  
18  
19  
20  
21  
22  
23  
24  
25  
26  
27  
28  
29  
30  
31  
32  
33  
34  
35  
36  
37  
38  
39  
40  
41  
42  
43  
44  
45  
46  
47  
48  
49  
50  
51  
52  
53  
54  
55  
56  
57  
58  
59  
60
